# Supplementary material for: The neuropeptide F/nitric oxide pathway is essential for shaping locomotor plasticity underlying locust phase transition
Source: eLife. 2017 Mar 27;6:e22526. doi: 10.7554/eLife.22526 (PMC5400507; doi:10.7554/eLife.22526)
Supplement: Figure 1—source data 1. — DOI: http://dx.doi.org/10.7554/eLife.22526.004 [file elife-22526-fig1-data1.xlsx]

## Sheet: expressions of NPs
Figure 1-Source data 1. mRNA levels of the four neuropeptide encoding genes during isolation and crowding in locusts
This dataset was generated to build Figure 1.
Figure 1	Isolation		Crowding
NPF1a (relative to rp49)	mean	SEM	mean	SEM
0 h	0.0431	0.012	0.0819	0.0111
1 h	0.0663	0.0178	0.0481	0.0069
4 h	0.0658	0.0094	0.0145	0.0079
16 h	0.0542	0.0129	0.0315	0.0104
32 h	0.1099	0.0186	0.0331	0.005
	Isolation		Crowding
NPF2 (relative to rp49)	mean	SEM	mean	SEM
0 h	0.0662	0.0137	0.1122	0.0117
1 h	0.073	0.0071	0.0884	0.0085
4 h	0.0729	0.0095	0.0613	0.0065
16 h	0.0505	0.0071	0.0531	0.0071
32 h	0.0642	0.0067	0.0464	0.0067
	Isolation		Crowding
ACP (relative to rp49)	mean	SEM	mean	SEM
0 h	3.9914	0.84726	0.872	0.49286
1 h	4.0914	0.54726	1.872	0.37286
4 h	4.0483	0.54421	2.5137	0.49743
16 h	3.9416	0.27015	3.339	0.42244
32 h	4.4644	0.27091	3.7273	0.38445
	Isolation		Crowding
ILP (relative to rp49)	mean	SEM	mean	SEM
0 h	0.4137	0.06216	0.1007	0.03933
1 h	0.252	0.04153	0.1607	0.02511
4 h	0.1161	0.02594	0.2533	0.03815
16 h	0.0809	0.03232	0.2933	0.04596
32 h	0.108	0.02334	0.374	0.0644
