# Supplementary material for: The neuropeptide F/nitric oxide pathway is essential for shaping locomotor plasticity underlying locust phase transition
Source: eLife. 2017 Mar 27;6:e22526. doi: 10.7554/eLife.22526 (PMC5400507; doi:10.7554/eLife.22526)
Supplement: Figure 3—source data 1. — DOI: http://dx.doi.org/10.7554/eLife.22526.013 [file elife-22526-fig3-data1.xlsx]

## Sheet: expression of two NPF receptors
Figure 3-source data 1. Transcript levels of NPFR and NPYR during the G/S locust phase transition
This dataset was used to build Figure 3C and Figure 3D
Figure 3C
	Isolation		Crowding
NPFR	mean	SEM	mean	SEM
0 h	0.0004	0.00016	0.0013	0.00062
1 h	0.0022	0.00052	0.0009	0.00029
4 h	0.0023	0.00039	0.0009	9e-05
16 h	0.0016	0.00013	0.0012	0.00026
32 h	0.0051	0.00051	0.0012	0.00043
Figure 3D	Isolation		Crowding
NPYR	mean	SEM	mean	SEM
0 h	0.0011	0.00015	0.0013	0.00016
1 h	0.001	0.00019	0.0009	0.00021
4 h	0.0018	0.00018	0.0003	0.00012
16 h	0.0014	9e-05	0.0008	0.00024
32 h	0.0017	8e-05	0.0007	6e-05
