# Supplementary material for: The neuropeptide F/nitric oxide pathway is essential for shaping locomotor plasticity underlying locust phase transition
Source: eLife. 2017 Mar 27;6:e22526. doi: 10.7554/eLife.22526 (PMC5400507; doi:10.7554/eLife.22526)
Supplement: Figure 4—source data 1. — DOI: http://dx.doi.org/10.7554/eLife.22526.018 [file elife-22526-fig4-data1.xlsx]

## Sheet: Sheet1
Figure4-Source data 1. The effects of NPF1a and NPF2 on the expression of annotated genes in the brain of fourth-instar locusts
This dataset was generated to analyze the effects of NPF1a and NPF2 on the expression of annotated gene in the brain of fourth-instar locusts.
This dataset shows gene transcript levels in three comparisons: gregarious (G) and solitarious (S), co-injection of NPF1a and NPF2 peptides in G locusts, dual-knockdown of NPF1a and NPF2 transcripts in S locusts.
There are three replicated for each treatment, derived from five male and five female locusts
Raw data were filtered, corrected, and mapped to locust genome sequence using Tophat software
Transcript levels of genes were calculated using the reads per kb million (RPKM) mapped reads criteria
Statistical analyses of differential expression between groups were performed using the DESeq package.
The dataset represents the RPKM values of differntially expessed genes in each sample
LogFC :Average log-2 fold change of each comparison from three replicates
P: unajusted P-value of each comparison
FDR: ajusted P-value of of each comparison
GeneID	G1	G2	G3	G-NPF1a+NPF2-1	G-NPF1a+NPF2-2	G-NPF1a+NPF2-3	S1	S2	S3	S-dsNPF1a+dsNPF2-1	S-dsNPF1a+dsNPF2-2	S-dsNPF1a+dsNPF2-3	logFC(G-NPF1a+NPF2/G)	G-NPF1a+NPF2/G(P)	G-NPF1a+NPF2/G(FDR)	logFC(S/G)	S/G(P)	S/G(FDR)	logFC(S-dsNPF1a+dsNPF2/S)	S-dsNPF1a+dsNPF2/S(P)	S-dsNPF1a+dsNPF2/S(FDR)	GO	nr
LOCMI03820	79.3263	58.6608	74.0985	138.382	147.431	157.309	96.0165	131.081	184.06	140.996	118.296	106.178	1.06234	8.20895e-07	0.0041675	0.954316	9.26705e-06	0.00281403	-0.169747	0.425668	1	GO:0005515; protein binding; Molecular Function	PREDICTED: inter-alpha-trypsin inhibitor heavy chain H4 isoform 1 [Acyrthosiphon pisum]
LOCMI05133	57.6701	1.98179	26.9131	0.220529	0.419633	1.87422	15.0277	11.7842	3.8903	8.38551	3.13457	0.359519	-5.08336	3.42589e-06	0.0074339	-1.4944	0.107168	0.67176	-1.36563	0.144027	1	GO:0004867; serine-type endopeptidase inhibitor activity; Molecular Function	serine protease inhibitor, serpin [Aedes aegypti] ref|XP_001657102.1| serine protease inhibitor, serpin [Aedes aegypti] gb|EAT44983.1| serine protease inhibitor, serpin [Aedes aegypti] gb|EAT44984.1| serine protease inhibitor, serpin [Aedes aegypti]
LOCMI16469	61.6185	23.9135	38.6803	6.28508	11.3301	17.1178	23.4019	33.1703	28.5694	19.0471	14.9914	6.83086	-1.83992	5.98545e-06	0.010678	-0.545979	0.163912	0.738507	-1.05767	0.00826378	0.726173	GO:0003824; catalytic activity; Molecular Function GO:0004252; serine-type endopeptidase activity; Molecular Function GO:0006508; proteolysis; Biological Process	trypsin-like serine protease [Locusta migratoria manilensis]
LOCMI16469	61.6185	23.9135	38.6803	6.28508	11.3301	17.1178	23.4019	33.1703	28.5694	19.0471	14.9914	6.83086	-1.83992	5.98545e-06	0.010678	-0.545979	0.163912	0.738507	-1.05767	0.00826378	0.726173	GO:0003824; catalytic activity; Molecular Function GO:0004252; serine-type endopeptidase activity; Molecular Function GO:0006508; proteolysis; Biological Process	trypsin-like serine protease [Locusta migratoria manilensis]
LOCMI03332	39.723	29.3304	31.9229	11.4675	18.6037	17.8675	21.4517	23.5684	18.7221	19.8856	19.7614	16.8974	-1.07888	1.53055e-05	0.0198582	-0.665093	0.00686464	0.250074	-0.171887	0.495067	1	GO:0006508; proteolysis; Biological Process GO:0008237; metallopeptidase activity; Molecular Function GO:0008241; peptidyl-dipeptidase activity; Molecular Function GO:0016020; membrane; Cellular Component	angiotensin converting enzyme [Locusta migratoria]
LOCMI15679	168.105	18.4967	21.5538	7.27746	7.69328	16.4931	18.0103	14.8394	37.201	20.844	24.3951	24.8068	-2.72439	1.72901e-05	0.0205637	-1.57017	0.00960847	0.290534	-0.000743457	1	1	NA	chemosensory protein [Locusta migratoria]
LOCMI02930	15.7935	15.8543	15.9615	31.0946	35.8087	36.9845	33.0379	27.351	34.0401	33.0629	13.6286	18.3355	1.1244	4.48787e-05	0.0454482	0.988288	0.000347344	0.0399781	-0.536372	0.0484953	1	GO:0005515; protein binding; Molecular Function GO:0006807; nitrogen compound metabolic process; Biological Process GO:0016810; hydrolase activity, acting on carbon-nitrogen (but not peptide) bonds; Molecular Function	Protein enabled [Harpegnathos saltator]
LOCMI04439	3.23048	0	9.9031	0.220529	0	0	25.0079	4.65549	5.47074	0.359379	0.272571	0.359519	-5.53601	5.59023e-05	0.0454482	1.41517	0.162152	0.735699	-5.07991	3.61384e-05	0.0286537	GO:0005515; protein binding; Molecular Function	PREDICTED: delta-like protein 1-like [Acyrthosiphon pisum]
LOCMI08352	0.358943	0.264238	19.6897	0	0.139878	0	84.3155	4.51	13.2513	2.15627	1.49914	0.11984	-6.86535	5.86647e-05	0.0454482	2.32568	0.0619999	0.572727	-4.74133	0.000673959	0.20039	NA	PREDICTED: similar to dusky-like CG15013-PA [Tribolium castaneum]
LOCMI03167	2.99119	0.924833	2.67966	0	0.279756	0	7.11233	5.96484	3.0393	2.75524	5.31513	0.359519	-4.4646	7.13086e-05	0.0454482	1.27922	0.118508	0.693459	-0.936552	0.251778	1	NA	PREDICTED: similar to Osiris 2 CG1148-PB [Tribolium castaneum] gb|EFA09547.1| hypothetical protein TcasGA2_TC011657 [Tribolium castaneum]
LOCMI17117	40.6802	34.6152	10.3691	0	2.37792	3.24864	2.17959	5.52839	28.2047	26.594	7.76827	4.67375	-3.92548	7.24147e-05	0.0454482	-1.25242	0.154641	0.730265	0.120082	0.893535	1	NA	PREDICTED: protein takeout-like [Acyrthosiphon pisum]
LOCMI08669	76.3351	7.53078	140.974	6.94667	13.708	7.49686	68.5996	54.702	183.695	13.0574	103.441	73.3419	-2.99735	7.32418e-05	0.0454482	0.449107	0.520831	0.940104	-0.693658	0.322811	1	NA	PREDICTED: probable Bax inhibitor 1-like [Acyrthosiphon pisum]
LOCMI16440	0.717885	1.58543	3.96124	0	0	0	1.03244	0	3.76873	0.718758	0.817713	0.359519	-7.0964	0.000112802	0.0574969	-0.374363	0.759624	0.994444	-1.331	0.254412	1	GO:0003700; sequence-specific DNA binding transcription factor activity; Molecular Function GO:0005634; nucleus; Cellular Component GO:0006355; regulation of transcription, DNA-dependent; Biological Process GO:0043565; sequence-specific DNA binding; Molecular Function	Forkhead box protein C2, putative [Pediculus humanus corporis] gb|EEB17608.1| Forkhead box protein C2, putative [Pediculus humanus corporis]
LOCMI07995	12.8023	14.1367	12.4663	23.2658	25.0381	30.7371	15.0277	7.56516	16.1691	15.0939	15.1277	14.6204	1.00372	0.00033637	0.11709	-0.0161006	0.96126	1	0.202945	0.479372	1	GO:0006508; proteolysis; Biological Process GO:0016020; membrane; Cellular Component	PREDICTED: venom dipeptidyl peptidase 4-like isoform 2 [Acyrthosiphon pisum]
LOCMI03473	21.2973	5.41688	18.2916	0.551323	1.95829	3.87338	2.63845	5.38291	2.67458	3.3542	6.26913	0.359519	-2.81487	0.000433634	0.131677	-2.07368	0.00730282	0.255456	-0.0996059	0.907518	1	GO:0004181; metallocarboxypeptidase activity; Molecular Function GO:0006508; proteolysis; Biological Process GO:0008270; zinc ion binding; Molecular Function	zinc carboxypeptidase [Culex quinquefasciatus] gb|EDS32879.1| zinc carboxypeptidase [Culex quinquefasciatus]
LOCMI01671	16.1524	8.85197	16.777	29.7714	32.4516	35.6101	25.2373	10.9113	20.5457	29.4691	13.4923	14.2609	1.22437	0.000546468	0.155178	0.441494	0.216901	0.781336	0.0111963	0.978287	1	GO:0005515; protein binding; Molecular Function	leucine-rich transmembrane protein, putative [Aedes aegypti] gb|EAT47116.1| leucine-rich transmembrane protein, putative [Aedes aegypti]
LOCMI00914	9.8111	4.62417	8.03899	39.8055	15.3866	13.2445	8.14477	5.38291	8.87475	9.58344	5.31513	3.47535	1.60476	0.000607725	0.159405	-0.00368774	1	1	-0.287227	0.556358	1	GO:0005515; protein binding; Molecular Function	Chain A, Structural Determinants For Improved Thermal Stability Of Designed Ankyrin Repeat Proteins With A Redesigned C- Capping Module. pdb|2XEH|B Chain B, Structural Determinants For Improved Thermal Stability Of Designed Ankyrin Repeat Proteins With A Redesigned C- Capping Module. pdb|2XEH|C Chain C, Structural Determinants For Improved Thermal Stability Of Designed Ankyrin Repeat Proteins Wit…
LOCMI17258	44.5089	11.8907	37.6318	13.5625	7.5534	10.8704	41.6416	25.8961	66.1351	23.5992	52.7425	17.0172	-1.55273	0.000810904	0.187095	0.50711	0.260353	0.81133	-0.519578	0.24977	1	NA	RecName: Full=Putative beta-carotene-binding protein
LOCMI15773	6.58062	5.81324	6.75741	9.92381	13.0086	15.6185	11.2421	9.74742	13.0082	13.4168	13.7648	13.3022	1.00393	0.000852099	0.187095	0.827304	0.00669539	0.246916	0.249166	0.389644	1	NA	PREDICTED: neutral ceramidase-like isoform 1 [Nasonia vitripennis]
LOCMI06083	5.62344	0.396357	3.61172	0.220529	0.419633	0	10.5538	6.11033	5.83545	4.19275	0.545142	0.11984	-3.84313	0.0010384	0.209891	1.21821	0.207059	0.775215	-2.1967	0.0299668	0.939427	GO:0005215; transporter activity; Molecular Function GO:0005622; intracellular; Cellular Component GO:0006810; transport; Biological Process	PREDICTED: clavesin-1-like [Apis mellifera]
LOCMI06083	5.62344	0.396357	3.61172	0.220529	0.419633	0	10.5538	6.11033	5.83545	4.19275	0.545142	0.11984	-3.84313	0.0010384	0.209891	1.21821	0.207059	0.775215	-2.1967	0.0299668	0.939427	GO:0005215; transporter activity; Molecular Function GO:0005622; intracellular; Cellular Component GO:0006810; transport; Biological Process	PREDICTED: clavesin-1-like [Apis mellifera]
LOCMI07227	2.87154	12.2871	6.99042	1.21291	1.67853	1.62432	22.943	2.47323	5.71388	6.58861	8.85856	6.11183	-2.28471	0.0011833	0.219325	0.49635	0.450589	0.915258	-0.534199	0.409056	1	NA	PREDICTED: protein takeout-like [Acyrthosiphon pisum]
LOCMI16493	0.837533	1.32119	1.51459	2.53608	6.01474	4.99791	2.63845	4.36452	2.43144	3.59379	3.67971	2.03728	1.86392	0.00135947	0.242529	1.34253	0.020943	0.401746	-0.0136378	1	1	GO:0008745; N-acetylmuramoyl-L-alanine amidase activity; Molecular Function GO:0009253; peptidoglycan catabolic process; Biological Process	PREDICTED: peptidoglycan-recognition protein LC-like [Bombus terrestris]
LOCMI07354	48.9358	17.0434	17.3596	2.86688	13.1485	6.49728	76.8591	9.89291	40.4835	25.7555	46.2008	32.4766	-1.89178	0.00145467	0.250228	0.611079	0.284252	0.833225	-0.286327	0.616002	1	NA	PREDICTED: protein takeout-like [Acyrthosiphon pisum]
LOCMI00669	0.239295	6.73807	0.233014	0	0	0	0	0	0	0	0	0	-7.2923	0.00151769	0.251866	-7.28034	0.00151769	0.102656	0	1	1	GO:0003779; actin binding; Molecular Function GO:0007010; cytoskeleton organization; Biological Process GO:0015629; actin cytoskeleton; Cellular Component GO:0030036; actin cytoskeleton organization; Biological Process	putative profilin [Hirudo medicinalis]
LOCMI15676	347.217	152.069	219.499	84.9037	144.634	156.684	235.51	151.594	218.708	77.9852	111.345	75.7387	-0.896652	0.0015943	0.260322	-0.246528	0.381456	0.882634	-1.19306	3.05648e-05	0.0256601	NA	chemosensory protein [Locusta migratoria] emb|CAJ01464.1| hypothetical protein [Locusta migratoria]
LOCMI16015	0	0.132119	9.78659	0	0	0	12.5039	1.01839	0.60786	0.838551	0.817713	0	-7.75541	0.00175159	0.271293	0.508844	0.749641	0.992232	-3.06295	0.071968	1	GO:0008152; metabolic process; Biological Process GO:0016491; oxidoreductase activity; Molecular Function GO:0055114; oxidation-reduction process; Biological Process	PREDICTED: similar to steroid dehydrogenase [Tribolium castaneum] gb|EFA10853.1| hypothetical protein TcasGA2_TC001630 [Tribolium castaneum]
LOCMI07872	1.31612	1.18907	0.349521	0	0	0	0	0	0.364716	0.119793	0.136286	0	-5.97024	0.00184007	0.275277	-2.78653	0.0379368	0.489986	-0.490961	1	1	GO:0005215; transporter activity; Molecular Function GO:0005622; intracellular; Cellular Component GO:0006810; transport; Biological Process	protein C20orf121, putative [Pediculus humanus corporis] gb|EEB12928.1| protein C20orf121, putative [Pediculus humanus corporis]
LOCMI15719	65.3276	25.2347	39.8454	43.1134	135.961	343.606	669.018	1524.53	273.172	326.795	887.627	214.393	2.00224	0.00185164	0.275277	4.24075	1.87922e-09	2.98003e-06	-0.787758	0.205896	1	GO:0005344; oxygen transporter activity; Molecular Function GO:0006810; transport; Biological Process	hexamerin-like protein 1 [Locusta migratoria]
LOCMI07808	2.5126	0	2.67966	0	0	0.249895	4.81803	3.05516	0.851004	1.07814	0.681428	0.599199	-4.15509	0.00204143	0.288468	0.738841	0.48331	0.923717	-1.86545	0.0866171	1	GO:0004222; metalloendopeptidase activity; Molecular Function GO:0006508; proteolysis; Biological Process	Zinc metalloproteinase nas-15 [Acromyrmex echinatior]
LOCMI16689	16.2721	2.64238	9.20406	1.8745	2.37792	3.37359	3.7856	5.09194	4.49816	4.55213	3.67971	1.31824	-1.88008	0.00256386	0.341976	-1.073	0.0739647	0.607057	-0.483578	0.446808	1	GO:0004553; hydrolase activity, hydrolyzing O-glycosyl compounds; Molecular Function GO:0004568; chitinase activity; Molecular Function GO:0005975; carbohydrate metabolic process; Biological Process GO:0006032; chitin catabolic process; Biological Process	chitinase [Ostrinia furnacalis]
LOCMI03037	8.13603	0.924833	6.6409	0.771852	1.53866	0.749686	9.1772	3.34613	4.01187	2.63545	2.58942	0.719038	-2.35597	0.00293141	0.383826	0.0749536	0.925163	1	-1.47521	0.0474974	1	GO:0003824; catalytic activity; Molecular Function GO:0004252; serine-type endopeptidase activity; Molecular Function GO:0005515; protein binding; Molecular Function GO:0006508; proteolysis; Biological Process	PREDICTED: atrial natriuretic peptide-converting enzyme-like [Nasonia vitripennis]
LOCMI03037	8.13603	0.924833	6.6409	0.771852	1.53866	0.749686	9.1772	3.34613	4.01187	2.63545	2.58942	0.719038	-2.35597	0.00293141	0.383826	0.0749536	0.925163	1	-1.47521	0.0474974	1	GO:0003824; catalytic activity; Molecular Function GO:0004252; serine-type endopeptidase activity; Molecular Function GO:0005515; protein binding; Molecular Function GO:0006508; proteolysis; Biological Process	PREDICTED: atrial natriuretic peptide-converting enzyme-like [Nasonia vitripennis]
LOCMI01103	3.94837	3.96357	4.54378	8.26984	10.0712	10.1208	4.12974	9.16549	10.3336	6.22924	7.22313	5.27295	1.18705	0.00327618	0.410154	0.916324	0.0239887	0.419123	-0.332508	0.416272	1	GO:0016491; oxidoreductase activity; Molecular Function GO:0055114; oxidation-reduction process; Biological Process	aminoadipic semialdehyde synthase, putative [Pediculus humanus corporis] gb|EEB10070.1| aminoadipic semialdehyde synthase, putative [Pediculus humanus corporis]
LOCMI00232	52.1663	4.09569	18.4081	2.09503	8.95218	6.24738	31.2025	5.67387	37.201	8.26572	20.034	14.0212	-2.11204	0.00347691	0.424123	-0.0108646	0.988778	1	-0.808865	0.244432	1	NA	CSP precursor [Locusta migratoria]
LOCMI13132	32.9031	8.19138	33.554	2.53608	7.83316	15.4935	18.0103	15.2758	16.2906	8.98447	17.3083	16.418	-1.53118	0.00356896	0.431662	-0.590612	0.249615	0.802728	-0.215861	0.678116	1	NA	RecName: Full=Cuticle protein 9.5; AltName: Full=LmNCP9.5
LOCMI16606	0	5.02052	0.349521	0	0	0	0.344145	0.436452	0	0	0	0	-6.86984	0.00540105	0.575252	-2.71849	0.112987	0.681061	-4.12582	0.164082	1	GO:0042302; structural constituent of cuticle; Molecular Function	cuticle protein, putative [Aedes aegypti] gb|EAT39440.1| cuticle protein, putative [Aedes aegypti]
LOCMI17143	2.15366	3.56721	4.31076	3.30794	25.4578	7.49686	3.55617	11.6387	6.80803	3.23441	16.8994	11.3848	1.84547	0.00689009	0.62634	1.12571	0.101199	0.660409	0.519811	0.440028	1	GO:0008152; metabolic process; Biological Process GO:0008168; methyltransferase activity; Molecular Function	juvenile hormone acid methyltransferase [Schistocerca gregaria]
LOCMI16366	5.38414	5.94536	9.20406	7.93905	17.7645	15.8684	9.86549	9.45646	12.1572	11.9793	8.4497	6.23167	1.01046	0.00782569	0.674615	0.614363	0.110044	0.673764	-0.239733	0.539222	1	GO:0008745; N-acetylmuramoyl-L-alanine amidase activity; Molecular Function GO:0009253; peptidoglycan catabolic process; Biological Process	putative peptidoglycan recognition protein LB [Phlebotomus perniciosus]
LOCMI04084	0.598238	0.132119	3.49521	0.110265	0.139878	0.124948	1.83544	0.436452	0.851004	0.598965	0.681428	0.11984	-3.35632	0.00963504	0.788215	-0.426895	0.706414	0.983413	-1.15025	0.324783	1	GO:0016620; oxidoreductase activity, acting on the aldehyde or oxo group of donors, NAD or NADP as acceptor; Molecular Function GO:0055114; oxidation-reduction process; Biological Process	PREDICTED: putative fatty acyl-CoA reductase CG5065-like isoform 1 [Nasonia vitripennis]
LOCMI17159	0.239295	0.924833	0.582535	0	0	0	0	0	0	0	0	0	-5.27293	0.0108071	0.833727	-5.2612	0.0108071	0.308165	0	1	1	GO:0042302; structural constituent of cuticle; Molecular Function	PREDICTED: flexible cuticle protein 12 [Apis mellifera]
LOCMI17492	1.91436	2.51026	3.02918	0.441058	0.839267	0.374843	1.72073	1.01839	0.851004	0.479172	2.18057	0.11984	-2.15548	0.0122145	0.887309	-1.03914	0.20449	0.773593	-0.391845	0.682074	1	NA	pheromone and odorant receptor, putative [Ixodes scapularis] gb|EEC19309.1| pheromone and odorant receptor, putative [Ixodes scapularis]
LOCMI02987	364.207	37.786	278.918	0.220529	35.3891	83.9648	159.339	283.548	98.2301	60.2559	131.379	31.2782	-2.50939	0.0122728	0.887309	-0.3316	0.727249	0.988071	-1.27935	0.18453	1	NA	Apolipoprotein D precursor, putative [Pediculus humanus corporis] gb|EEB16576.1| Apolipoprotein D precursor, putative [Pediculus humanus corporis]
LOCMI06135	2.87154	1.18907	1.04856	6.17481	7.27364	3.24864	0.803005	2.03678	0.364716	1.19793	3.27085	2.75631	1.69653	0.0122868	0.887309	-0.693873	0.392468	0.888249	1.18416	0.105476	1	NA	Kruppel-like zinc finger protein, putative [Ixodes scapularis] gb|EEC08118.1| Kruppel-like zinc finger protein, putative [Ixodes scapularis]
LOCMI03881	2.03401	1.32119	3.49521	3.63873	5.0356	7.37191	6.76819	5.81936	7.65903	7.06779	4.08857	6.35151	1.21223	0.0133137	0.893879	1.55068	0.00131513	0.0947953	-0.208042	0.656296	1	GO:0007155; cell adhesion; Biological Process GO:0016021; integral to membrane; Cellular Component GO:0042246; tissue regeneration; Biological Process	Ninjurin-1, putative [Pediculus humanus corporis] gb|EEB12102.1| Ninjurin-1, putative [Pediculus humanus corporis]
LOCMI10868	89.8553	26.2917	98.4485	230.784	168.972	169.679	106.341	95.4375	141.996	187.476	23.1685	345.019	1.4075	0.0141715	0.915973	0.679519	0.230279	0.789305	0.692775	0.220865	1	NA	RecName: Full=Putative defense protein; AltName: Full=Basic 19 kDa hemolymph protein; Flags: Precursor gb|AAA29283.1| basic 19k protein precursor [Locusta migratoria] prf||1515168A hemolymph protein 19kD
LOCMI11714	25.9635	5.81324	14.9129	5.84402	6.43438	9.49602	9.86549	6.98323	7.29432	4.43234	6.81428	6.35151	-1.10113	0.0143763	0.915973	-0.949947	0.0340553	0.472458	-0.458531	0.325333	1	GO:0005576; extracellular region; Cellular Component GO:0006030; chitin metabolic process; Biological Process GO:0008061; chitin binding; Molecular Function	cuticular protein analogous to peritrophins 3-A2 precursor [Tribolium castaneum] gb|ACY95476.1| cuticular protein analogous to peritrophins 3-A2 [Tribolium castaneum] gb|EEZ97330.1| hypothetical protein TcasGA2_TC011141 [Tribolium castaneum]
LOCMI17138	0.239295	6.34171	0.349521	0.220529	0.139878	0.249895	0.114715	0	0.121572	0.239586	0	0.239679	-3.39634	0.0150603	0.946875	-4.57111	0.00307755	0.163282	0.870307	0.776189	1	GO:0004553; hydrolase activity, hydrolyzing O-glycosyl compounds; Molecular Function GO:0004568; chitinase activity; Molecular Function GO:0005975; carbohydrate metabolic process; Biological Process GO:0006032; chitin catabolic process; Biological Process	midgut chitinase [Locusta migratoria manilensis]
LOCMI05976	0.119648	2.37814	0.116507	0	0	0	0	0	0	0	0	0	-5.83953	0.0154603	0.959347	-5.8277	0.0154603	0.351827	0	1	1	GO:0003824; catalytic activity; Molecular Function GO:0005975; carbohydrate metabolic process; Biological Process GO:0043169; cation binding; Molecular Function	alpha-glucosidase [Culex quinquefasciatus] gb|EDS38951.1| alpha-glucosidase [Culex quinquefasciatus]
LOCMI03825	0	0	0	1.21291	0	0.874634	0.45886	0	0.486288	0.479172	0	1.7976	5.54341	0.01619	1	4.43706	0.077759	0.615886	1.21138	0.471549	1	GO:0008270; zinc ion binding; Molecular Function GO:0016491; oxidoreductase activity; Molecular Function GO:0055114; oxidation-reduction process; Biological Process	PREDICTED: prostaglandin reductase 1-like [Nasonia vitripennis]
LOCMI17280	0	0.660595	0.699042	0.330794	2.23804	6.62223	0.344145	0.290968	0.121572	0.119793	0.136286	0.239679	2.71821	0.0177127	1	-0.805016	0.575716	0.954897	-0.560001	0.832976	1	GO:0005344; oxygen transporter activity; Molecular Function GO:0006810; transport; Biological Process	pro-phenoloxidase 1 [Locusta migratoria]
LOCMI10859	6.70026	3.30298	8.272	6.94667	16.5056	13.6193	8.48891	11.0568	4.86288	13.6564	8.99484	14.3808	1.01104	0.0182462	1	0.408901	0.345509	0.868615	0.605543	0.160751	1	NA	amino acid transporter protein [Glossina morsitans morsitans]
LOCMI03155	2.75189	4.22781	8.73803	7.93905	15.9461	11.87	16.0601	15.5668	3.64716	11.3803	9.13113	8.98798	1.17887	0.0203445	1	1.16043	0.0224839	0.413437	-0.256001	0.60952	1	NA	sodium-dependent phosphate transporter [Culex quinquefasciatus] gb|EDS41975.1| sodium-dependent phosphate transporter [Culex quinquefasciatus]
LOCMI13380	1.31612	0.792714	0.932057	2.53608	2.5178	2.74885	1.72073	2.18226	1.45886	1.6771	2.72571	2.15712	1.34211	0.0204448	1	0.797767	0.1673	0.739648	0.291011	0.648969	1	GO:0005524; ATP binding; Molecular Function GO:0009396; folic acid-containing compound biosynthetic process; Biological Process GO:0030272; 5-formyltetrahydrofolate cyclo-ligase activity; Molecular Function	PREDICTED: 5-formyltetrahydrofolate cyclo-ligase-like [Danio rerio]
LOCMI06907	2.39295	1.84967	2.09713	2.86688	5.73499	8.99623	1.03244	1.16387	3.52559	1.79689	2.45314	0.958718	1.46275	0.020679	1	-0.143132	0.854201	1	-0.145227	0.839545	1	GO:0016021; integral to membrane; Cellular Component	PREDICTED: CD63 antigen-like [Nasonia vitripennis]
LOCMI14280	1.31612	7.6629	0	0.110265	0.979144	0.874634	8.03005	16.1487	18.4789	9.70323	6.81428	16.5379	-2.18116	0.0227262	1	2.24898	0.0104606	0.304393	-0.366443	0.662726	1	GO:0003824; catalytic activity; Molecular Function GO:0051536; iron-sulfur cluster binding; Molecular Function	radical S-adenosyl methionine domain-containing protein 2 [Danio rerio] sp|Q5RH95.1|RSAD2_DANRE RecName: Full=Radical S-adenosyl methionine domain-containing protein 2; AltName: Full=Viperin; AltName: Full=Virus inhibitory protein, endoplasmic reticulum-associated, interferon-inducible emb|CAI11967.1| novel radical SAM superfamily protein [Danio rerio] gb|AAH96889.1| Radical S-adenosyl methionine…
LOCMI08656	34.4585	3.03874	17.4761	4.85164	5.45523	11.1203	31.6613	12.3661	12.6435	6.10944	5.72399	3.83487	-1.35884	0.0241456	1	0.044088	0.942756	1	-1.85355	0.00232748	0.393889	NA	Cuticlin-1 [Camponotus floridanus]
LOCMI17292	0.95718	1.84967	0.699042	4.9619	0.839267	5.62265	0.91772	1.60032	0.972576	0.718758	0.408857	0.359519	1.70488	0.0242047	1	-0.00788279	1	1	-1.19102	0.17472	1	NA	LSM Sm-like protein family member [Danaus plexippus]
LOCMI02988	0	7.00231	0	0	0	0	0	0	17.6279	0	0	0	-7.25206	0.0246126	1	1.32883	0.54419	0.948478	-8.55456	0.00904604	0.735777	GO:0005215; transporter activity; Molecular Function GO:0005488; binding; Molecular Function GO:0006810; transport; Biological Process	32 kDa apolipoprotein [Danaus plexippus]
LOCMI17164	56.7129	9.38045	28.6607	4.41058	13.2884	17.4927	21.1076	12.8026	24.5575	4.43234	13.0834	1.55792	-1.42989	0.0249664	1	-0.695798	0.265395	0.814563	-1.61902	0.0121517	0.806646	NA	protein takeout precursor, putative [Pediculus humanus corporis] gb|EEB19876.1| protein takeout precursor, putative [Pediculus humanus corporis]
LOCMI17164	56.7129	9.38045	28.6607	4.41058	13.2884	17.4927	21.1076	12.8026	24.5575	4.43234	13.0834	1.55792	-1.42989	0.0249664	1	-0.695798	0.265395	0.814563	-1.61902	0.0121517	0.806646	NA	protein takeout precursor, putative [Pediculus humanus corporis] gb|EEB19876.1| protein takeout precursor, putative [Pediculus humanus corporis]
LOCMI13143	0.47859	1.05695	0.466028	2.97714	2.79756	0.999581	3.55617	2.32774	1.45886	0.479172	1.63543	2.39679	1.74846	0.0252453	1	1.86542	0.0176262	0.364581	-0.700622	0.362277	1	GO:0003735; structural constituent of ribosome; Molecular Function GO:0005622; intracellular; Cellular Component GO:0005840; ribosome; Cellular Component GO:0006412; translation; Biological Process	ribosomal protein L36e [Blattella germanica]
LOCMI00615	0	5.28476	0.116507	0.110265	0	0	0	0	0	0	0	0	-5.05062	0.0259064	1	-6.86665	0.0104896	0.304393	0	1	1	GO:0003746; translation elongation factor activity; Molecular Function GO:0003924; GTPase activity; Molecular Function GO:0005525; GTP binding; Molecular Function GO:0005737; cytoplasm; Cellular Component GO:0006414; translational elongation; Biological Process	elongation factor 1A [Arcyria denudata]
LOCMI07355	2.5126	0	0.116507	0	0	0	0	0	0.851004	0.119793	0.408857	0.11984	-5.85945	0.0262038	1	-1.56667	0.408286	0.89331	-0.393837	0.895988	1	NA	PREDICTED: protein takeout-like [Acyrthosiphon pisum]
LOCMI10636	5.0252	1.71755	3.02918	19.6271	2.5178	6.49728	0.22943	0.436452	0.486288	0.239586	0.272571	0.239679	1.54866	0.0295301	1	-3.0475	0.000279146	0.0348857	-0.577934	0.703449	1	GO:0003824; catalytic activity; Molecular Function GO:0005764; lysosome; Cellular Component GO:0008152; metabolic process; Biological Process GO:0008449; N-acetylglucosamine-6-sulfatase activity; Molecular Function GO:0008484; sulfuric ester hydrolase activity; Molecular Function GO:0030203; glycosaminoglycan metabolic process; Biological Process	N-acetylglucosamine-6-sulfatase precursor, putative [Pediculus humanus corporis] gb|EEB15340.1| N-acetylglucosamine-6-sulfatase precursor, putative [Pediculus humanus corporis]
LOCMI15416	7.65744	2.90662	7.80597	0	2.37792	2.49895	1.03244	8.43807	3.76873	3.23441	3.81599	1.07856	-1.916	0.0325736	1	-0.47807	0.582035	0.956407	-0.69692	0.436451	1	GO:0004222; metalloendopeptidase activity; Molecular Function GO:0006508; proteolysis; Biological Process GO:0008237; metallopeptidase activity; Molecular Function GO:0008270; zinc ion binding; Molecular Function	Low choriolytic enzyme precursor, putative [Pediculus humanus corporis] gb|EEB14095.1| Low choriolytic enzyme precursor, putative [Pediculus humanus corporis]
LOCMI03379	2.63225	3.43509	4.31076	8.49037	5.45523	7.74676	4.93275	1.60032	5.47074	3.59379	2.58942	2.63647	1.06217	0.0326004	1	0.218928	0.676875	0.978403	-0.451494	0.386871	1	GO:0006508; proteolysis; Biological Process GO:0008236; serine-type peptidase activity; Molecular Function	dipeptidylpeptidase IV [Vespa basalis]
LOCMI08475	0.358943	1.05695	0.582535	1.43344	1.67853	3.12369	0.68829	0.436452	0.364716	0.119793	0.136286	0.359519	1.62974	0.0342758	1	-0.391553	0.709929	0.984705	-1.2103	0.273091	1	GO:0005415; nucleoside:sodium symporter activity; Molecular Function GO:0006810; transport; Biological Process GO:0016020; membrane; Cellular Component	sodium/nucleoside cotransporter [Aedes aegypti] gb|EAT43913.1| sodium/nucleoside cotransporter [Aedes aegypti]
LOCMI15811	0	3.69933	0	0	0	0	0	0	0	0	0	0	-6.33748	0.0343601	1	-6.32559	0.0343601	0.472458	0	1	1	GO:0003824; catalytic activity; Molecular Function GO:0005975; carbohydrate metabolic process; Biological Process GO:0006108; malate metabolic process; Biological Process GO:0016491; oxidoreductase activity; Molecular Function GO:0016615; malate dehydrogenase activity; Molecular Function GO:0016616; oxidoreductase activity, acting on the CH-OH group of donors, NAD or NADP as acceptor; Molecular F…	malate dehydrogenase [Naegleria gruberi] gb|EFC46229.1| malate dehydrogenase [Naegleria gruberi]
LOCMI04049	1.79471	0.264238	1.6311	0	0	0.249895	4.70332	0	0.729432	0.479172	1.77171	0	-3.66342	0.0350099	1	0.556268	0.713617	0.985009	-1.27127	0.399596	1	NA	PREDICTED: similar to Osiris 2 CG1148-PB [Tribolium castaneum] gb|EFA09547.1| hypothetical protein TcasGA2_TC011657 [Tribolium castaneum]
LOCMI08867	1.55542	33.9546	1.51459	2.42582	3.49694	1.62432	0.22943	0.290968	2.43144	0	0	0	-2.28773	0.036033	1	-3.62043	0.00194907	0.122005	-6.00111	0.00189001	0.33992	GO:0005576; extracellular region; Cellular Component GO:0006030; chitin metabolic process; Biological Process GO:0008061; chitin binding; Molecular Function	mucin-like protein 1 [Ctenocephalides felis]
LOCMI07108	3.11084	4.62417	2.56316	4.63111	4.05646	13.3694	5.16218	8.1471	8.63161	5.27089	10.7666	4.79359	1.09931	0.0369249	1	1.0896	0.0413557	0.50036	-0.0764097	0.89375	1	GO:0016614; oxidoreductase activity, acting on CH-OH group of donors; Molecular Function GO:0050660; FAD or FADH2 binding; Molecular Function	glucose dehydrogenase [Danaus plexippus]
LOCMI00031	0	3.43509	0	0	0	0	0	0	0	0	0	0	-6.2316	0.037301	1	-6.21972	0.03905	0.492163	0	1	1	GO:0003735; structural constituent of ribosome; Molecular Function GO:0005622; intracellular; Cellular Component GO:0005840; ribosome; Cellular Component GO:0006412; translation; Biological Process	ribosomal protein rpl23a [Coprinopsis cinerea okayama7#130] gb|EAU85713.2| ribosomal protein rpl23a [Coprinopsis cinerea okayama7#130]
LOCMI01441	0.95718	0.264238	1.16507	0.110265	0.139878	0.249895	0.573575	0.145484	0.364716	1.07814	1.22657	0.838878	-2.17502	0.0373918	1	-1.08492	0.273308	0.822923	1.46027	0.111698	1	GO:0005215; transporter activity; Molecular Function GO:0005622; intracellular; Cellular Component GO:0006810; transport; Biological Process	protein C20orf121, putative [Pediculus humanus corporis] gb|EEB12928.1| protein C20orf121, putative [Pediculus humanus corporis]
LOCMI11009	0.95718	7.00231	0.116507	0	0.559511	0.124948	0.114715	0	0.60786	0	0.953999	0.958718	-3.51047	0.0391586	1	-3.37825	0.0391586	0.492163	1.32518	0.462664	1	GO:0008152; metabolic process; Biological Process GO:0016491; oxidoreductase activity; Molecular Function GO:0055114; oxidation-reduction process; Biological Process	PREDICTED: similar to putative alcohol dehydrogenase [Tribolium castaneum] gb|EFA05875.1| hypothetical protein TcasGA2_TC008684 [Tribolium castaneum]
LOCMI10835	1.07683	0	3.14569	0	0	0.374843	1.37658	1.30936	0	1.07814	1.63543	0.359519	-3.34841	0.0392546	1	-0.651243	0.67431	0.97749	0.190498	0.9257	1	NA	OS-D-like protein [Maconellicoccus hirsutus]
LOCMI17355	4.06802	2.51026	5.12631	1.8745	1.2589	1.24948	5.50632	1.60032	0.972576	2.63545	1.77171	3.47535	-1.40403	0.0394074	1	-0.524665	0.424061	0.90049	-0.0420376	1	1	GO:0004497; monooxygenase activity; Molecular Function GO:0055114; oxidation-reduction process; Biological Process	kynurenine 3-monooxygenase [Anopheles stephensi]
LOCMI16140	13.8791	18.4967	10.4856	22.3837	13.0086	56.8512	6.65347	22.1136	16.2906	16.5314	42.2485	9.70702	1.10603	0.0411404	1	0.0703946	0.902989	1	0.604443	0.263584	1	GO:0004497; monooxygenase activity; Molecular Function GO:0005506; iron ion binding; Molecular Function GO:0009055; electron carrier activity; Molecular Function GO:0020037; heme binding; Molecular Function GO:0055114; oxidation-reduction process; Biological Process	PREDICTED: similar to antennae-rich cytochrome P450 [Tribolium castaneum] gb|EFA12855.1| cytochrome P450 345B1 [Tribolium castaneum]
LOCMI03176	0	2.7745	0.466028	0	0	0	0	0	2.06672	0.479172	0	0	-6.14961	0.0413846	1	-0.628877	0.787246	0.999202	-1.99715	0.407852	1	NA	Solute carrier organic anion transporter family member 5A1 [Acromyrmex echinatior]
LOCMI05702	16.2721	2.24602	12.6993	6.06455	56.6505	38.8587	22.2547	5.23742	17.0201	54.0266	3.81599	10.0665	1.69889	0.0414215	1	0.511499	0.536847	0.947218	0.608188	0.456214	1	GO:0016491; oxidoreductase activity; Molecular Function GO:0055114; oxidation-reduction process; Biological Process	epsilon-trimethyllysine 2-oxoglutarate dioxygenase [Aedes aegypti] gb|EAT47152.1| epsilon-trimethyllysine 2-oxoglutarate dioxygenase [Aedes aegypti]
LOCMI04571	0.239295	0.396357	0.815549	0.771852	1.81841	2.24906	0.344145	0.72742	0.364716	0.598965	0.272571	0.599199	1.6907	0.0424438	1	-0.046329	1	1	0.0694771	1	1	GO:0005515; protein binding; Molecular Function	roadkill, isoform A [Drosophila melanogaster] ref|XP_001979869.1| GG21588 [Drosophila erecta] ref|XP_002013602.1| GL23319 [Drosophila persimilis] ref|XP_002031257.1| GM25894 [Drosophila sechellia] ref|XP_002097926.1| GE10070 [Drosophila yakuba] ref|XP_002103504.1| GD20464 [Drosophila simulans] gb|AAF55007.3| roadkill, isoform A [Drosophila melanogaster] gb|EDV48827.1| GG21588 [Drosophila erecta] …
LOCMI06160	1.07683	86.2737	13.6313	0.110265	13.1485	0.499791	0	3.78258	3.64716	0.119793	0.272571	0.11984	-2.87502	0.0428782	1	-3.75916	0.0111271	0.309483	-3.75047	0.0192532	0.897055	GO:0005576; extracellular region; Cellular Component GO:0006030; chitin metabolic process; Biological Process GO:0008061; chitin binding; Molecular Function	peritrophic membrane protein 1 [Holotrichia oblita]
LOCMI00517	0	3.03874	0	0	0	0	0	0	0	0	0	0	-6.05665	0.0434518	1	-6.04479	0.0457207	0.516647	0	1	1	GO:0006457; protein folding; Biological Process GO:0051082; unfolded protein binding; Molecular Function	RecName: Full=DnaJ homolog subfamily A member 2; AltName: Full=RDJ2; Flags: Precursor gb|AAB64094.1| DnaJ homolog 2 [Rattus norvegicus]
LOCMI00725	1.43577	1.58543	1.98062	0.771852	0.699389	0.249895	3.09731	1.74581	1.21572	2.03648	1.36286	0.599199	-1.5113	0.0440274	1	0.278473	0.695767	0.981227	-0.599495	0.417809	1	NA	PREDICTED: similar to Inter-alpha-trypsin inhibitor heavy chain H4 precursor (ITI heavy chain H4) (Inter-alpha-inhibitor heavy chain 4) (Inter-alpha-trypsin inhibitor family heavy chain-related protein) (IHRP) (Plasma kallikrein sensitive glycoprotein 120) (P [Tribolium castaneum] gb|EFA04005.1| hypothetical protein TcasGA2_TC014154 [Tribolium castaneum]
LOCMI13474	8.73427	16.7791	1.51459	33.6307	16.3657	18.2424	0.344145	1.89129	3.0393	1.55731	3.95228	3.47535	1.3378	0.0441909	1	-2.35031	0.000922731	0.0761226	0.76618	0.298994	1	NA	RecName: Full=Cuticle protein 1; AltName: Full=Bc-NCP1
LOCMI14484	0.239295	0	0.349521	0.551323	0.979144	0.874634	1.60601	1.45484	1.45886	1.19793	0.681428	0.838878	1.89823	0.04431	1	2.80878	0.00103187	0.0810385	-0.719229	0.331321	1	GO:0005215; transporter activity; Molecular Function GO:0006810; transport; Biological Process GO:0016021; integral to membrane; Cellular Component GO:0055085; transmembrane transport; Biological Process	PREDICTED: facilitated trehalose transporter Tret1-like [Bombus terrestris]
LOCMI03227	0	4.8884	0	0	0	0	0	0	1.94515	0	0	0	-6.73703	0.0443511	1	-1.30241	0.598499	0.957801	-5.40861	0.117856	1	GO:0005215; transporter activity; Molecular Function GO:0006810; transport; Biological Process GO:0016021; integral to membrane; Cellular Component GO:0055085; transmembrane transport; Biological Process	PREDICTED: sodium-independent sulfate anion transporter-like [Nasonia vitripennis]
LOCMI12923	0.837533	0.264238	3.02918	0.330794	0.419633	0.124948	6.8829	2.03678	1.45886	0.359379	0.545142	0	-2.19419	0.0456255	1	1.3159	0.173512	0.744473	-3.47774	0.00145379	0.304765	NA	predicted protein [Pediculus humanus corporis] gb|EEB11451.1| predicted protein [Pediculus humanus corporis]
LOCMI14928	130.057	28.6698	174.295	13.1215	38.886	92.0864	336.23	490.135	191.962	92.7198	332.809	125.592	-1.20884	0.0476739	1	1.61213	0.00876794	0.283755	-0.885782	0.143145	1	GO:0008152; metabolic process; Biological Process GO:0016491; oxidoreductase activity; Molecular Function GO:0055114; oxidation-reduction process; Biological Process	putative alcohol dehydrogenase [Gryllotalpa orientalis]
LOCMI06513	0	4.09569	0	0	0	0	0	0	1.09415	0	0	0	-6.48373	0.0487359	1	-1.85056	0.442862	0.909952	-4.60744	0.182937	1	GO:0000166; nucleotide binding; Molecular Function GO:0005524; ATP binding; Molecular Function GO:0006810; transport; Biological Process GO:0016021; integral to membrane; Cellular Component GO:0016887; ATPase activity; Molecular Function GO:0017111; nucleoside-triphosphatase activity; Molecular Function GO:0042626; ATPase activity, coupled to transmembrane movement of substances; Molecular Functi…	PREDICTED: similar to ATP-binding cassette transporter [Tribolium castaneum]
LOCMI15675	46.184	3.43509	1.86411	1.43344	10.351	2.37401	0	0.436452	2.30987	5.03131	2.862	4.79359	-1.86332	0.0768621	1	-4.20262	0.000326155	0.0384701	2.18619	0.0483273	1	NA	chemosensory protein [Locusta migratoria]
LOCMI15490	12.8023	4.09569	4.54378	2.86688	5.87487	2.24906	6.0799	2.61871	4.25502	0.958344	0.545142	0.599199	-0.968684	0.104926	1	-0.720786	0.221568	0.784087	-2.59578	0.000154371	0.0759716	GO:0003824; catalytic activity; Molecular Function GO:0004555; alpha,alpha-trehalase activity; Molecular Function GO:0005991; trehalose metabolic process; Biological Process	soluble trehalase [Locusta migratoria manilensis]
LOCMI06504	1.07683	0.528476	0.466028	0.220529	4.19633	1.87422	0.91772	0.872904	3.0393	0.479172	0.136286	0.11984	1.56893	0.118735	1	1.2052	0.246753	0.799789	-2.63167	0.0194781	0.897055	GO:0016620; oxidoreductase activity, acting on the aldehyde or oxo group of donors, NAD or NADP as acceptor; Molecular Function GO:0055114; oxidation-reduction process; Biological Process	PREDICTED: putative fatty acyl-CoA reductase CG5065-like isoform 1 [Acyrthosiphon pisum] ref|XP_003248209.1| PREDICTED: putative fatty acyl-CoA reductase CG5065-like isoform 2 [Acyrthosiphon pisum]
LOCMI06096	2.03401	2.1139	9.78659	1.8745	3.07731	1.49937	18.6985	3.20065	5.22759	2.99482	1.63543	0.958718	-1.11284	0.143366	1	0.959226	0.192447	0.762323	-2.27156	0.00309539	0.469973	GO:0005488; binding; Molecular Function	PREDICTED: similar to C-type lectin (AGAP002625-PA) [Tribolium castaneum] gb|EFA04533.1| hypothetical protein TcasGA2_TC010412 [Tribolium castaneum]
LOCMI16335	0.358943	0	1.28158	0	0.279756	0.124948	2.86788	2.03678	0.729432	0.598965	0.136286	0.11984	-1.98132	0.159591	1	1.73631	0.11391	0.683592	-2.64336	0.0256055	0.909441	GO:0006520; cellular amino acid metabolic process; Biological Process GO:0016831; carboxy-lyase activity; Molecular Function GO:0019752; carboxylic acid metabolic process; Biological Process GO:0030170; pyridoxal phosphate binding; Molecular Function	PREDICTED: aromatic-L-amino-acid decarboxylase-like isoform 2 [Nasonia vitripennis]
LOCMI00861	5.26449	1.45331	3.72823	1.76423	1.11902	2.12411	3.7856	2.32774	1.21572	0.958344	0.953999	0	-1.05279	0.16894	1	-0.508804	0.504273	0.931546	-1.92607	0.0195965	0.897055	NA	PREDICTED: similar to inter-alpha (globulin) inhibitor H4 (plasma Kallikrein-sensitive glycoprotein) [Tribolium castaneum]
LOCMI15497	14.4774	8.3235	10.6021	5.18243	11.6099	6.62223	13.4217	4.94645	5.95703	3.95317	4.49742	2.63647	-0.517807	0.252315	1	-0.45211	0.320512	0.85235	-1.13864	0.0158687	0.86442	GO:0016758; transferase activity, transferring hexosyl groups; Molecular Function	chitin synthase 1 variant A [Locusta migratoria manilensis]
LOCMI04083	2.15366	0.396357	5.24282	1.98476	0.419633	1.49937	10.8979	3.20065	2.79615	0.958344	0.681428	0.838878	-0.981743	0.258052	1	1.10953	0.174845	0.746005	-2.74626	0.00186016	0.33992	GO:0004623; phospholipase A2 activity; Molecular Function GO:0005509; calcium ion binding; Molecular Function GO:0016042; lipid catabolic process; Biological Process	PREDICTED: group 3 secretory phospholipase A2-like [Bombus impatiens]
LOCMI08260	10.4093	39.6357	4.31076	1.98476	118.896	1.87422	1.72073	1.60032	2.55301	0.718758	0.136286	0.11984	1.17453	0.265832	1	-3.19817	0.00515612	0.219012	-2.52415	0.0411508	0.968822	GO:0006508; proteolysis; Biological Process GO:0008234; cysteine-type peptidase activity; Molecular Function	dipeptidyl-peptidase 1 [Trichinella spiralis] gb|EFV61034.1| dipeptidyl-peptidase 1 [Trichinella spiralis]
LOCMI11313	0.358943	0.528476	0.233014	0	0.139878	0.249895	0.114715	0.290968	0.364716	0.239586	2.04428	1.31824	-1.44909	0.298074	1	-0.517626	0.730736	0.989051	2.16322	0.0390796	0.968822	NA	PREDICTED: pyrimidine-specific ribonucleoside hydrolase rihA-like [Bombus impatiens]
LOCMI07248	13.9988	88.1234	12.1167	3.85926	225.623	5.12285	1.26187	2.90968	9.60418	1.55731	0.408857	0.359519	1.03785	0.332306	1	-3.04677	0.00804812	0.269449	-2.5379	0.027909	0.939427	GO:0003824; catalytic activity; Molecular Function GO:0004252; serine-type endopeptidase activity; Molecular Function GO:0006508; proteolysis; Biological Process	serine protease-like protein [Schistocerca gregaria]
LOCMI14809	0.358943	0.660595	0.349521	0.330794	1.11902	0.999581	0	0	0	0.598965	0	0.359519	0.813538	0.442107	1	-4.91779	0.0113836	0.309483	4.44401	0.0322476	0.949796	GO:0005524; ATP binding; Molecular Function	PREDICTED: replication factor C subunit 4-like [Ornithorhynchus anatinus]
LOCMI11254	2.75189	0.528476	2.56316	0.771852	0.279756	2.74885	1.14715	15.1303	29.2988	33.6618	52.6062	49.2541	-0.61589	0.483721	1	2.94725	0.000255239	0.0322369	1.57163	0.0357864	0.951104	GO:0004871; signal transducer activity; Molecular Function GO:0007165; signal transduction; Biological Process GO:0007186; G-protein coupled receptor protein signaling pathway; Biological Process GO:0019001; guanyl nucleotide binding; Molecular Function	guanine nucleotide binding protein alpha q polypeptide [Glossina morsitans morsitans]
LOCMI17048	42.3552	10.3053	25.7481	6.94667	23.6393	31.7367	29.1376	33.4613	66.8646	18.6877	20.5791	24.8068	-0.333618	0.485109	1	0.722479	0.128253	0.705347	-1.01435	0.0333686	0.949796	GO:0004553; hydrolase activity, hydrolyzing O-glycosyl compounds; Molecular Function GO:0004568; chitinase activity; Molecular Function GO:0005576; extracellular region; Cellular Component GO:0005975; carbohydrate metabolic process; Biological Process GO:0006030; chitin metabolic process; Biological Process GO:0006032; chitin catabolic process; Biological Process GO:0008061; chitin binding; Molec…	chitinase 5 precursor [Nasonia vitripennis]
LOCMI15942	1.67507	3.30298	7.80597	2.64635	4.19633	2.49895	17.8955	2.47323	6.80803	2.15627	3.40714	2.39679	-0.456187	0.513727	1	1.08761	0.101895	0.661624	-1.77238	0.00922814	0.735777	GO:0008415; acyltransferase activity; Molecular Function	Carnitine O-palmitoyltransferase I, liver isoform [Camponotus floridanus]
LOCMI07517	13.1612	72.5333	3.96124	7.93905	125.33	4.37317	0.803005	4.21903	13.9808	1.79689	0.953999	1.07856	0.618102	0.544869	1	-2.23473	0.0360883	0.482711	-2.29524	0.0350914	0.949796	GO:0003824; catalytic activity; Molecular Function GO:0004252; serine-type endopeptidase activity; Molecular Function GO:0006508; proteolysis; Biological Process	serine protease 48 precursor [Nasonia vitripennis]
LOCMI08178	3.82872	5.68112	4.8933	3.74899	4.47609	3.49854	3.55617	1.45484	2.1883	4.43234	7.08685	3.47535	-0.296553	0.546603	1	-0.981116	0.045835	0.516712	1.03617	0.0338949	0.949796	GO:0005096; GTPase activator activity; Molecular Function GO:0005515; protein binding; Molecular Function GO:0005622; intracellular; Cellular Component GO:0051056; regulation of small GTPase mediated signal transduction; Biological Process	rap GTPase-activating protein, putative [Pediculus humanus corporis] gb|EEB14429.1| rap GTPase-activating protein, putative [Pediculus humanus corporis]
LOCMI04924	8.37533	101.6	6.05837	1.8745	69.799	2.8738	0.344145	6.40129	14.5886	1.43752	0.817713	0.719038	-0.63857	0.575083	1	-2.44073	0.0409485	0.499929	-2.8214	0.0241586	0.909439	GO:0004553; hydrolase activity, hydrolyzing O-glycosyl compounds; Molecular Function GO:0004568; chitinase activity; Molecular Function GO:0005975; carbohydrate metabolic process; Biological Process GO:0006032; chitin catabolic process; Biological Process	chitinase 5 [Litopenaeus vannamei]
LOCMI11127	12.563	126.438	11.1847	2.97714	204.781	4.74801	0.91772	3.20065	12.0356	1.07814	0.817713	0.599199	0.50053	0.652181	1	-3.21241	0.00776193	0.26502	-2.67226	0.0296944	0.939427	GO:0004181; metallocarboxypeptidase activity; Molecular Function GO:0006508; proteolysis; Biological Process GO:0008270; zinc ion binding; Molecular Function	PREDICTED: zinc carboxypeptidase A 1-like [Bombus impatiens]
LOCMI13447	20.8187	1.05695	37.5153	2.75661	27.5559	13.7442	1.14715	18.6219	1.33729	12.0991	72.6402	29.1211	-0.432249	0.666308	1	-1.4956	0.140081	0.714522	2.43316	0.0196844	0.897055	GO:0005506; iron ion binding; Molecular Function GO:0005737; cytoplasm; Cellular Component GO:0019310; inositol catabolic process; Biological Process GO:0050113; inositol oxygenase activity; Molecular Function GO:0055114; oxidation-reduction process; Biological Process	PREDICTED: inositol oxygenase-like [Apis mellifera]
LOCMI15644	4.06802	47.9592	4.07775	1.10265	39.4455	1.24948	0.68829	1.74581	3.76873	0.239586	0.272571	0.359519	-0.425422	0.689004	1	-3.16705	0.00609569	0.239005	-2.7646	0.027997	0.939427	NA	esterase 1 [Liposcelis bostrychophila]
LOCMI09500	4.7859	6.34171	5.12631	4.63111	4.75584	4.99791	5.27689	1.16387	2.91773	7.42717	8.17713	6.47135	-0.174625	0.70592	1	-0.774698	0.101136	0.660391	1.21576	0.0104863	0.775445	NA	PREDICTED: lachesin-like [Acyrthosiphon pisum]
LOCMI03391	4.06802	4.8884	5.70885	3.08741	4.47609	5.37275	2.75316	1.74581	3.8903	4.91151	6.95056	5.63247	-0.184497	0.706282	1	-0.793626	0.0889165	0.639212	1.04507	0.0229248	0.901332	GO:0009190; cyclic nucleotide biosynthetic process; Biological Process GO:0016849; phosphorus-oxygen lyase activity; Molecular Function GO:0023034; intracellular signaling pathway; Biological Process	Adenylate cyclase type 2 [Harpegnathos saltator]
LOCMI14959	3.70907	2.7745	3.84473	3.08741	2.09817	3.74843	3.21202	2.90968	2.1883	15.0939	4.90628	3.71503	-0.20656	0.7183	1	-0.313872	0.609782	0.961378	1.50951	0.00743892	0.69391	GO:0005515; protein binding; Molecular Function	PREDICTED: 26S proteasome non-ATPase regulatory subunit 6-like [Bombus impatiens]
LOCMI15649	8.97357	3.69933	5.0098	1.65397	8.95218	4.12327	0.344145	5.09194	0.729432	0.479172	0.545142	0.599199	-0.268475	0.750641	1	-1.53357	0.0671412	0.587485	-1.87521	0.0453443	1	NA	esterase 1 [Liposcelis bostrychophila]
LOCMI02034	1.91436	0.660595	0.932057	0.992381	0.559511	1.24948	0.114715	0.290968	0.364716	1.07814	1.36286	0.958718	-0.315971	0.752518	1	-2.14312	0.0136446	0.331671	2.08906	0.0165593	0.876043	GO:0005506; iron ion binding; Molecular Function GO:0010181; FMN binding; Molecular Function GO:0016491; oxidoreductase activity; Molecular Function GO:0055114; oxidation-reduction process; Biological Process	nitric oxide synthase [Gryllus bimaculatus]
LOCMI06792	3.70907	4.49205	3.2622	4.19005	3.07731	5.99749	3.55617	0.290968	1.82358	5.86986	5.17885	2.75631	0.212644	0.75516	1	-0.98639	0.118865	0.694682	1.25394	0.0429442	0.985368	GO:0003700; sequence-specific DNA binding transcription factor activity; Molecular Function GO:0005634; nucleus; Cellular Component GO:0006355; regulation of transcription, DNA-dependent; Biological Process GO:0043565; sequence-specific DNA binding; Molecular Function	Forkhead box protein N3 [Camponotus floridanus]
LOCMI01762	0.47859	0.924833	0.699042	1.21291	0.699389	0.624738	0.573575	0.72742	1.33729	0.119793	0.272571	0.11984	0.284053	0.766719	1	0.329126	0.766719	0.997312	-2.29003	0.0186321	0.897055	GO:0016779; nucleotidyltransferase activity; Molecular Function	PREDICTED: probable tRNA(His) guanylyltransferase-like isoform 1 [Nasonia vitripennis]
LOCMI06426	6.10203	5.02052	14.4469	9.81354	5.87487	7.24697	33.7262	9.60194	8.75318	8.86468	9.4037	6.11183	-0.156204	0.771849	1	1.02547	0.0420866	0.501647	-1.09712	0.0314958	0.944344	GO:0016491; oxidoreductase activity; Molecular Function	Iodotyrosine dehalogenase 1 precursor, putative [Pediculus humanus corporis] gb|EEB18288.1| Iodotyrosine dehalogenase 1 precursor, putative [Pediculus humanus corporis]
LOCMI09067	4.66625	5.549	3.02918	5.18243	6.57426	2.99874	3.09731	1.89129	2.1883	3.95317	7.63199	3.83487	0.1556	0.776033	1	-0.870215	0.0977021	0.656332	1.08714	0.0352419	0.949796	GO:0005515; protein binding; Molecular Function	PREDICTED: kelch-like ECH-associated protein 1-like [Bombus terrestris]
LOCMI15629	7.41815	6.60595	4.42727	5.18243	6.15462	5.62265	4.12974	5.96484	4.61973	2.39586	2.04428	2.39679	-0.121924	0.781807	1	-0.329396	0.434562	0.907265	-1.09313	0.0114826	0.799416	NA	alpha-esterase [Danaus plexippus]
LOCMI01022	4.7859	3.56721	1.16507	4.85164	2.79756	2.99874	5.39161	7.85613	3.64716	2.39586	1.77171	3.23567	0.168554	0.801678	1	0.82322	0.144961	0.722809	-1.17766	0.0398993	0.968822	GO:0004222; metalloendopeptidase activity; Molecular Function GO:0006508; proteolysis; Biological Process	PREDICTED: neprilysin-like [Nasonia vitripennis]
LOCMI04449	23.2116	58.1324	31.9229	30.6535	56.091	20.3665	35.5617	78.5613	24.0712	14.7345	15.6728	17.6164	-0.0810094	0.846285	1	0.286014	0.485611	0.923857	-1.52225	0.000298973	0.115323	NA	Magnesium-dependent phosphatase, putative [Pediculus humanus corporis] gb|EEB19279.1| Magnesium-dependent phosphatase, putative [Pediculus humanus corporis]
LOCMI04826	2.39295	1.71755	1.51459	2.20529	1.81841	2.12411	1.14715	1.01839	1.21572	2.75524	4.90628	2.75631	0.129809	0.867684	1	-0.723209	0.225723	0.789131	1.60112	0.00421725	0.540688	GO:0005622; intracellular; Cellular Component GO:0008270; zinc ion binding; Molecular Function	PREDICTED: similar to dusky-like CG15013-PA [Tribolium castaneum]
LOCMI08397	0.239295	0.660595	0.233014	0.220529	0.279756	0.874634	0	0	0	1.43752	0.681428	0.239679	0.281449	0.89396	1	-4.64784	0.0241965	0.419123	5.67879	0.0016136	0.314443	GO:0007186; G-protein coupled receptor protein signaling pathway; Biological Process GO:0016021; integral to membrane; Cellular Component	Rhodopsin, GQ-coupled, putative [Pediculus humanus corporis] gb|EEB10708.1| Rhodopsin, GQ-coupled, putative [Pediculus humanus corporis]
LOCMI15127	14.597	200.292	8.85454	5.51323	198.906	3.87338	1.95016	4.80097	17.9926	2.27607	0.408857	0.958718	-0.103367	0.928327	1	-3.17381	0.0103616	0.302415	-2.74384	0.0272247	0.933272	GO:0003824; catalytic activity; Molecular Function GO:0004252; serine-type endopeptidase activity; Molecular Function GO:0006508; proteolysis; Biological Process	MPA3 allergen [Periplaneta americana]
LOCMI07727	5.14484	1.45331	5.70885	2.42582	2.65768	7.74676	1.26187	0.72742	1.94515	0.958344	6.95056	6.47135	0.0567235	0.953583	1	-1.62838	0.0377236	0.489892	1.84719	0.0167284	0.876043	GO:0005576; extracellular region; Cellular Component	catrin, putative [Aedes aegypti] gb|EAT33653.1| catrin, putative [Aedes aegypti]
LOCMI15551	44.0303	22.3281	29.0103	12.6804	39.0259	45.356	21.6811	31.7155	55.4368	13.6564	19.7614	16.7776	0.0233418	0.955416	1	0.190016	0.635378	0.967313	-1.11653	0.00593944	0.623132	NA	PREDICTED: similar to putative esterase [Tribolium castaneum] gb|EFA05148.1| hypothetical protein TcasGA2_TC015265 [Tribolium castaneum]
LOCMI07895	23.8099	169.112	18.6411	5.07217	194.71	7.74676	2.40902	7.41968	17.7495	2.03648	2.31685	1.31824	-0.0280039	0.977705	1	-2.9372	0.00478257	0.213303	-2.27353	0.0286087	0.939427	GO:0005515; protein binding; Molecular Function	PREDICTED: leucine-rich repeat-containing protein 38 [Danio rerio]
LOCMI16595	0	0	0.349521	0	0.419633	0	0	0	0	0	5.99656	0.359519	0.169386	1	1	-3.10893	0.436785	0.907539	7.08588	0.011924	0.801629	NA	RecName: Full=Cuticle protein 21.3; AltName: Full=LmNCP21.3
LOCMI15140	0.119648	0.264238	0.116507	0.220529	0.139878	0.124948	1.4913	0.72742	0.243144	0.119793	0.136286	0.11984	-0.0061612	1	1	2.22307	0.0504385	0.538011	-2.57978	0.0273872	0.933272	GO:0003777; microtubule motor activity; Molecular Function GO:0007018; microtubule-based movement; Biological Process GO:0030286; dynein complex; Cellular Component	ciliary dynein heavy chain, putative [Pediculus humanus corporis] gb|EEB18279.1| ciliary dynein heavy chain, putative [Pediculus humanus corporis]
LOCMI15697	5.0252	10.3053	10.0196	3.19767	10.6307	11.3702	4.24446	4.51	3.16087	0.838551	1.49914	2.39679	-0.0119827	1	1	-1.08714	0.0431123	0.502758	-1.32043	0.0226684	0.901179	GO:0005515; protein binding; Molecular Function	glutathione S-transferase sigma 2 [Locusta migratoria]
