# Supplementary material for: The neuropeptide F/nitric oxide pathway is essential for shaping locomotor plasticity underlying locust phase transition
Source: eLife. 2017 Mar 27;6:e22526. doi: 10.7554/eLife.22526 (PMC5400507; doi:10.7554/eLife.22526)
Supplement: Figure 5—source data 1. — DOI: http://dx.doi.org/10.7554/eLife.22526.022 [file elife-22526-fig5-data1.xlsx]

## Sheet: expression of two NPF receptors
Figure 5-source data 1. Time-course changes in NOS mRNA level, NOS protein level and NO level during the G/S phase transition.
This dataset represents the raw data for Figure 5C, 5D and 5E.
Figure 5C	Isolation				Crowding
NOS mRNA level (relative to rp49)	mean	SEM			mean	SEM
0 h	0.0346	0.00355			0.0187	0.00138
1 h	0.0298	0.00423			0.0174	0.00304
4 h	0.0282	0.00164			0.0193	0.00322
16 h	0.0213	0.00229			0.0315	0.0015
32 h	0.017	0.00214			0.0332	0.00408
Figure 5D	Isolation		NOS phosphorylation/tubulin		Isolation
NOS protein/tubulin	mean	SEM			mean	SEM
0 h	0.5013	0.0378			0.2521	0.0354
1 h	0.4728	0.0528			0.1645	0.0268
4 h	0.5725	0.0588			0.1025	0.0259
16 h	0.5476	0.0566			0.0886	0.0214
32 h	0.3579	0.0227			0.0708	0.0194
Figure 5E	Crowding		NOS phosphorylation/tubulin		Crowding
NOS protein/tubulin	mean	SEM			mean	SEM
0 h	0.2722	0.0401			0.0496	0.0191
1 h	0.2561	0.0215			0.0482	0.0203
4 h	0.4661	0.063			0.241	0.0185
16 h	0.5879	0.0292			0.2865	0.036
32 h	0.6082	0.0568			0.2722	0.0367
Figure 5F	Isolation				Crowding
NO levels (Data were normalized to the protein concentration.)	mean	SEM			mean	SEM
0 h	40.3907	3.7724			17.5099	2.315
1 h	23.8734	2.236			17.9168	2.3063
4 h	14.8023	1.298			18.9628	3.2453
16 h	11.9964	2.5749			20.4013	2.0024
32 h	10.6825	1.9395			35.4323	4.1742
