# Supplementary material for: The neuropeptide F/nitric oxide pathway is essential for shaping locomotor plasticity underlying locust phase transition
Source: eLife. 2017 Mar 27;6:e22526. doi: 10.7554/eLife.22526 (PMC5400507; doi:10.7554/eLife.22526)
Supplement: Figure 9—source data 1. — DOI: http://dx.doi.org/10.7554/eLife.22526.031 [file elife-22526-fig9-data1.xlsx]

## Sheet: NOS mRNA and protein levels
Figure 9-source data 1.NOS mRNA levels and NOS protein levels after injection of NPF1a or NPF2 peptide in G-phase locusts pre-injected with dsNPFR or dsNPYR.
This dataset was used to build Figure 9E, 9F, 9G and 9H
Figure 9E	mean	SEM
NOS mRNA level (relative to rp49)
dsGFP	0.0414	0.0055057
dsGFP+NPF1	0.0409	0.0067086
dsGFP+NPF2	0.0284	0.0038879
dsNPFR	0.0391	0.0081161
dsNPFR+NPF1	0.0493	0.0083
dsNPFR+NPF2	0.0256	0.0043235
Figure 9G
NOS mRNA level (relative to rp49)	mean	SEM
dsGFP	0.0414	0.0055057
dsGFP+NPF1	0.0409	0.0067086
dsGFP+NPF2	0.0284	0.0038879
dsNPYR	0.0591	0.0116
dsNPYR+NPF1	0.0489	0.0063
dsNPYR+NPF2	0.0456	0.0046355
Figure 9F
Total NOS protein/tubulin	mean	SEM	phosphorylated NOS/tubulin	mean	SEM
dsGFP	1.1165	0.1034		0.5618	0.076
dsGFP+NPF1	1.3568	0.187		0.2563	0.028
dsGFP+NPF2	0.7352	0.028		0.2752	0.0475
dsNPFR	1.4157	0.119		0.6734	0.083
dsNPFR+NPF1	1.3916	0.187		0.6178	0.059
dsNPFR+NPF2	0.827	0.069		0.3943	0.075
Figure 9H
Total NOS protein/tubulin	mean	SEM	phosphorylated NOS/tubulin	mean	SEM
dsGFP	0.9511	0.092		0.4784	0.042
dsGFP+NPF1	0.7967	0.1094		0.2356	0.061
dsGFP+NPF2	0.5088	0.038		0.2449	0.036
dsNPYR	0.9295	0.0693		0.4787	0.033
dsNPYR+NPF1	0.8994	0.0627		0.2358	0.049
dsNPYR+NPF2	1.0618	0.104		0.4683	0.065
