# Supplementary figures and images for: The neuropeptide F/nitric oxide pathway is essential for shaping locomotor plasticity underlying locust phase transition
Source: eLife journal article supplement (doi:10.7554/elife.22526), 2017-03-27

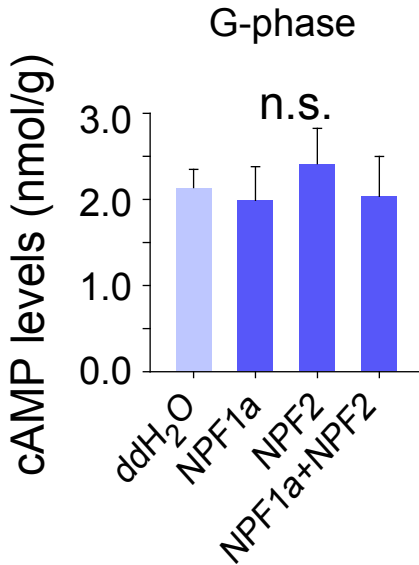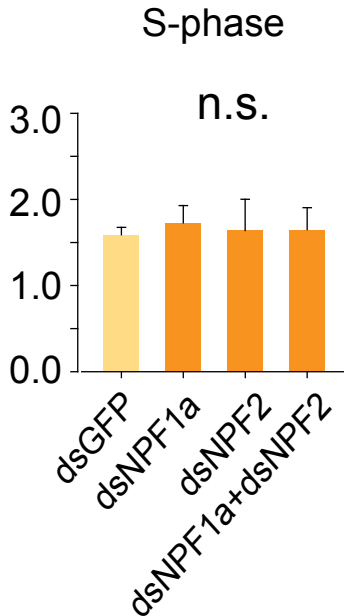

Supplement: supp [file elife-22526-supp-v1.zip]

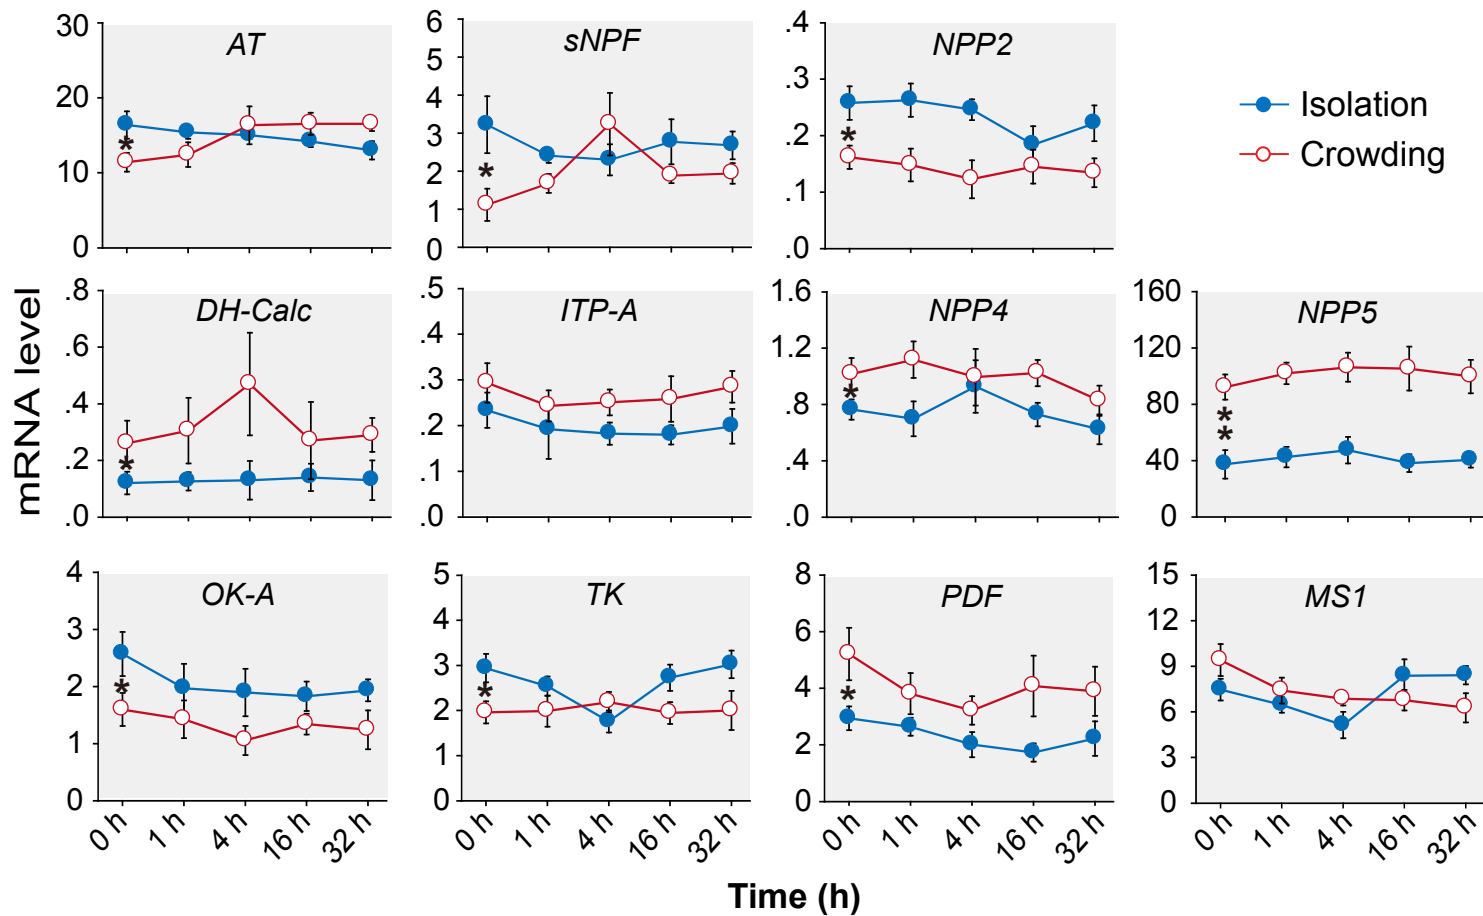

Supplement: supp [file elife-22526-supp-v1.zip]

**G-phase****G-phase****S-phase****A**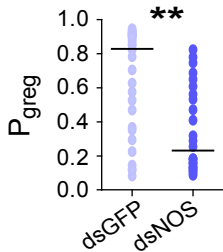**C**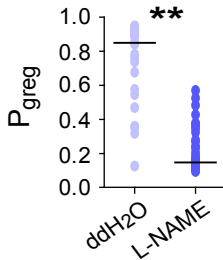**E**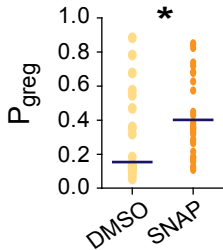**B**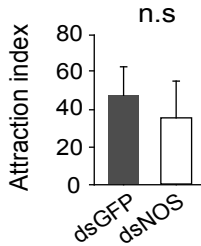**D**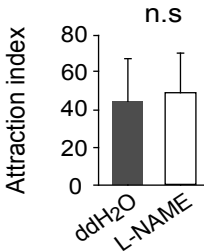**F**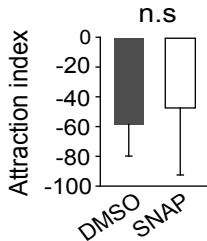

Supplement: supp [file elife-22526-supp-v1.zip]

## Peptide injection of G-phase locusts

**A**

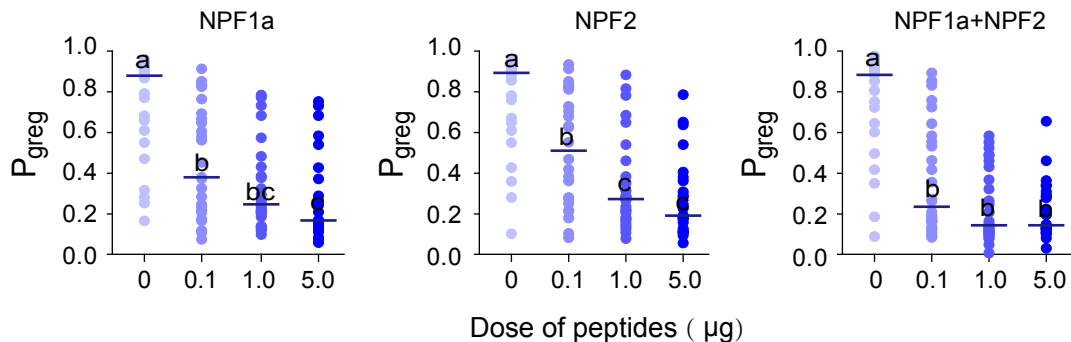

**B**

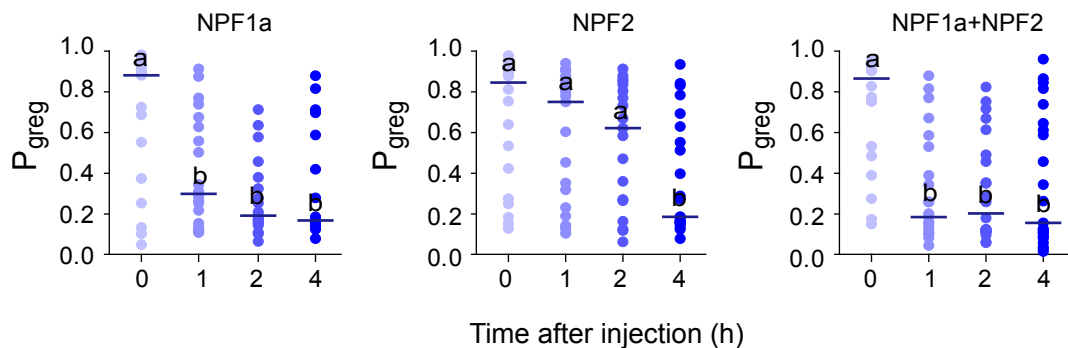

Supplement: supp [file elife-22526-supp-v1.zip]

# dsRNA injection of G-phase locusts

**A**

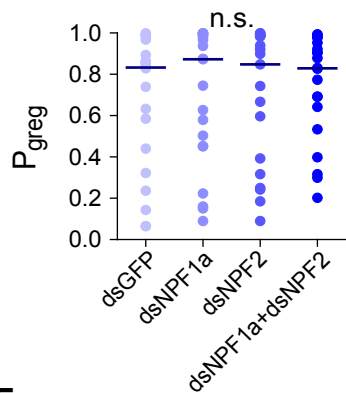

**B**

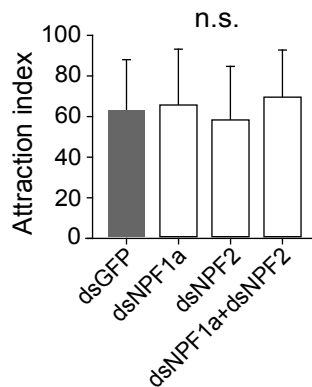

**E**

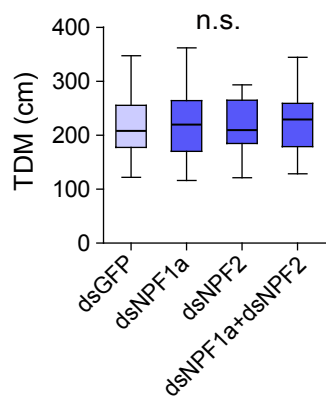

**F**

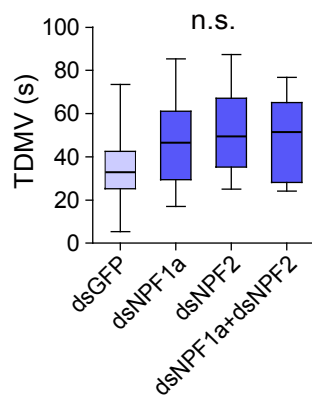

# Peptide injection of S-phase locusts

**C**

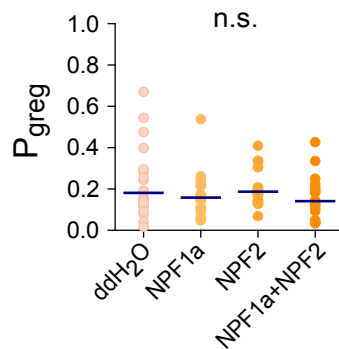

**D**

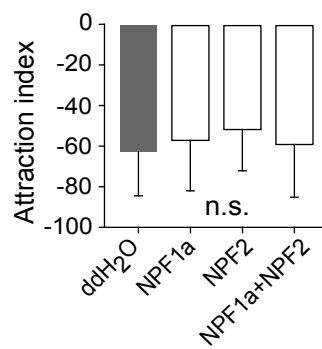

**G**

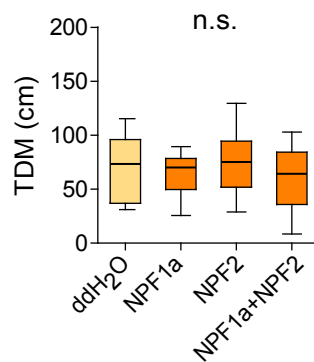

**H**

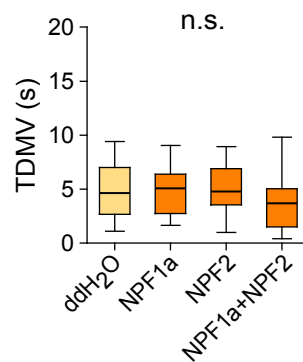

Supplement: supp [file elife-22526-supp-v1.zip]

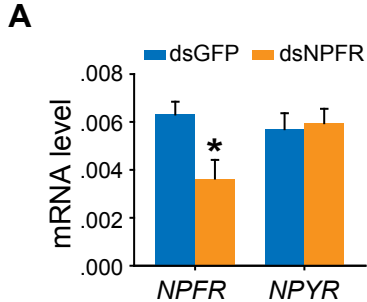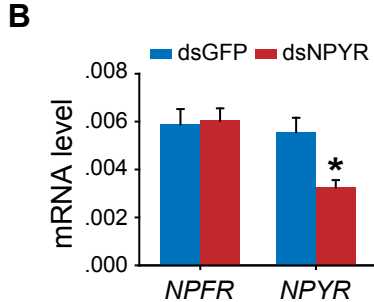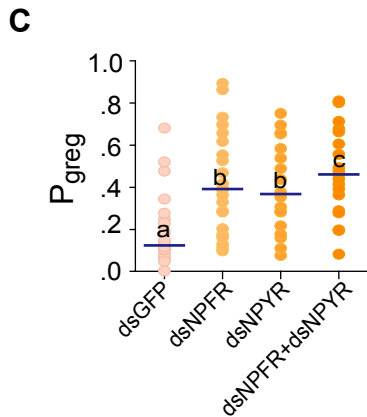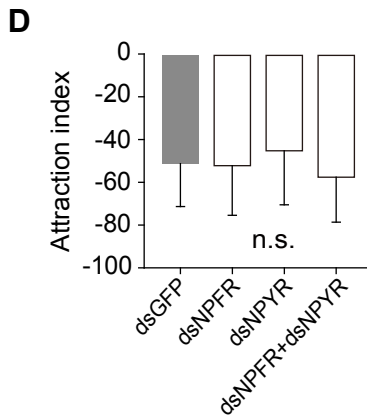

Supplement: supp [file elife-22526-supp-v1.zip]

**A**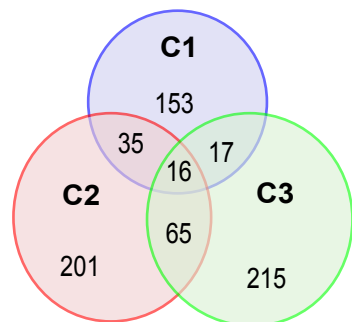

C1: S/G  
 C2: G-NPF1a+NPF2/G  
 C3: S-dsNPF1a+dsNPF2/S

**B**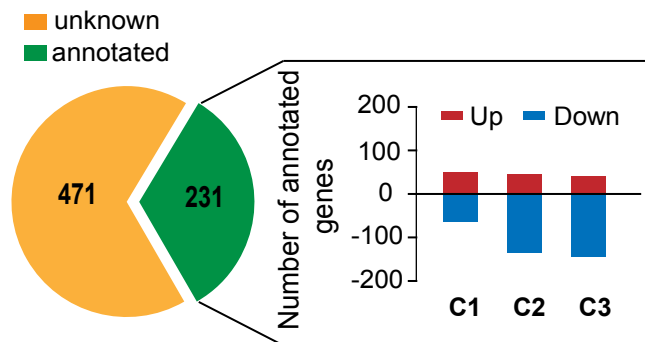**C**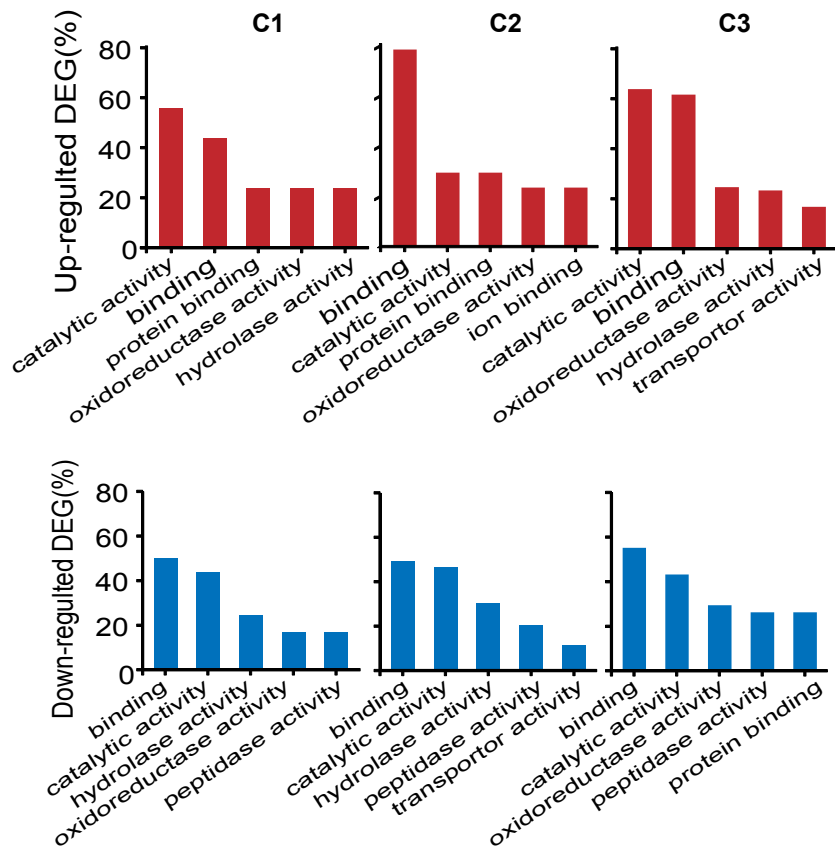**D**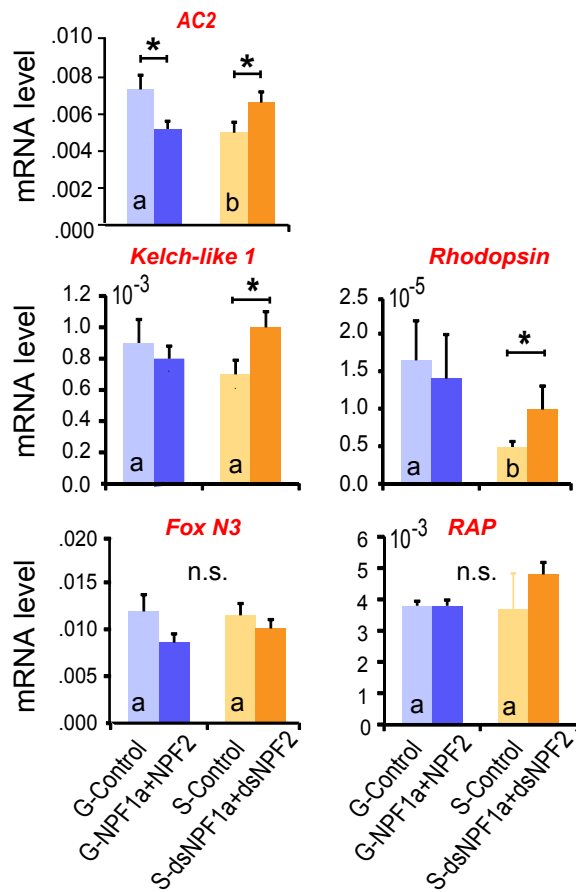

Supplement: supp [file elife-22526-supp-v1.zip]

**A**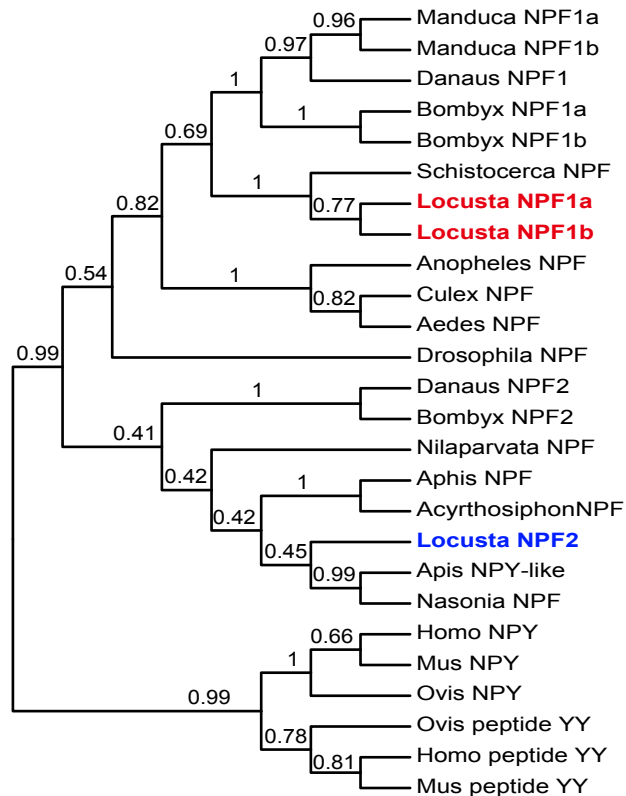**B**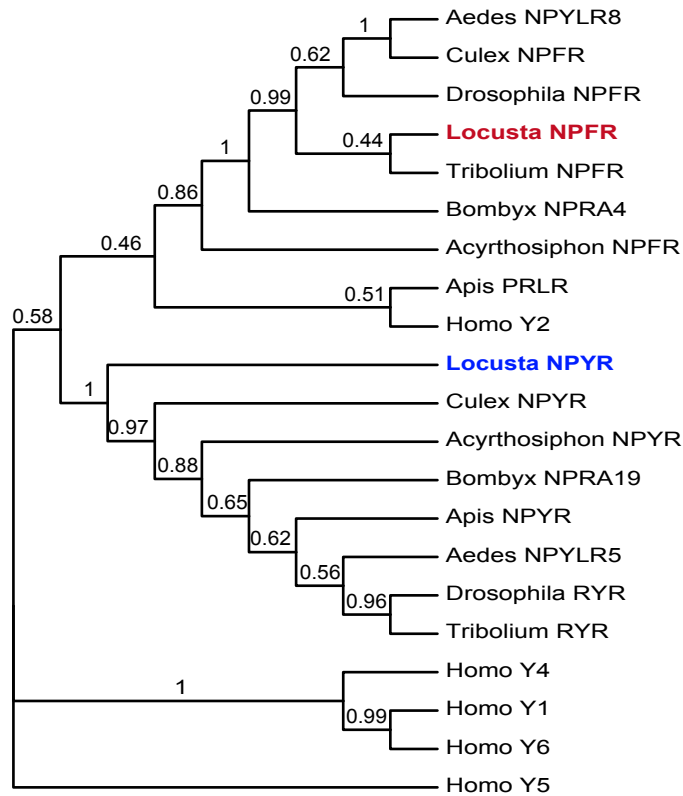

Supplement: supp [file elife-22526-supp-v1.zip]

**G-phase****G-phase****S-phase****A**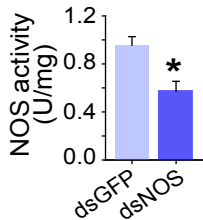**C**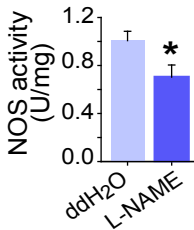**E**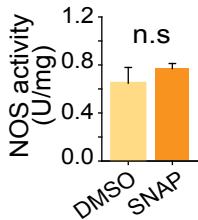**B**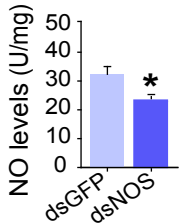**D**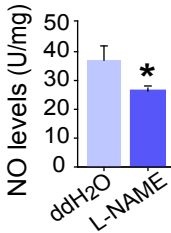**F**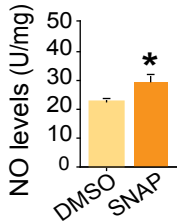

Supplement: supp [file elife-22526-supp-v1.zip]

**A**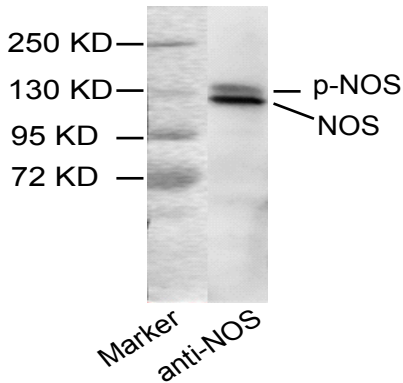**B**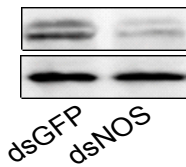**C**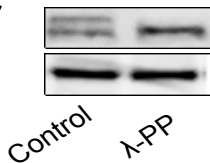**D**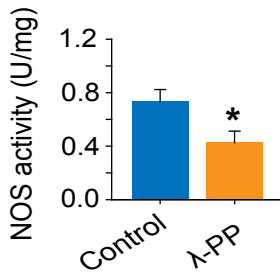**E**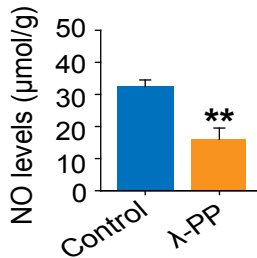

Supplement: supp [file elife-22526-supp-v1.zip]

**A****G-phase**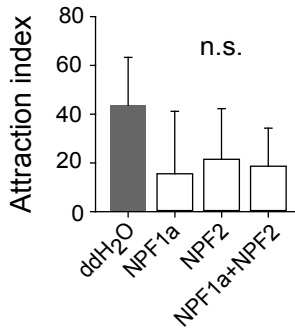**B****S-phase**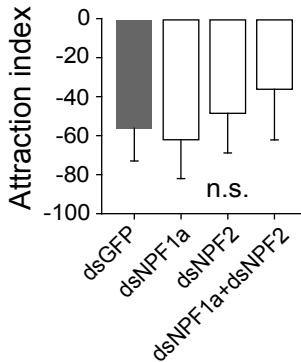

Supplement: supp [file elife-22526-supp-v1.zip]

**A**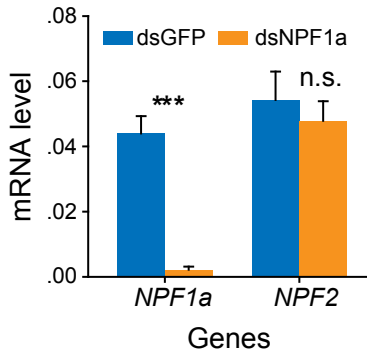**B**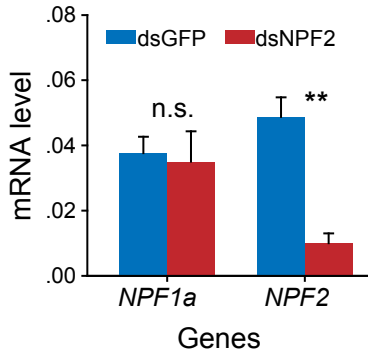

Supplement: supp [file elife-22526-supp-v1.zip]

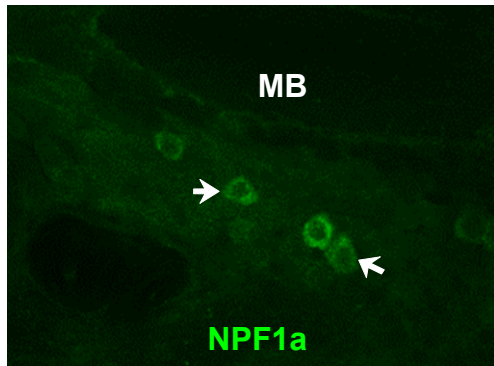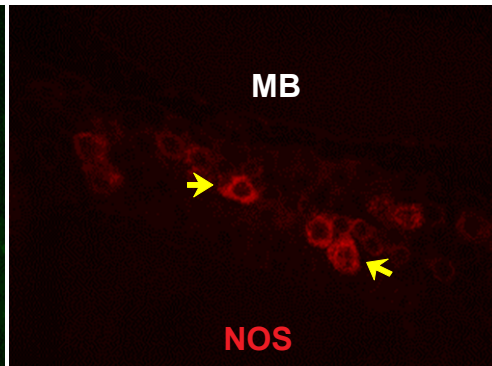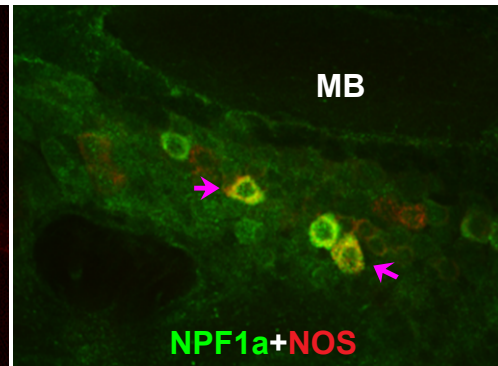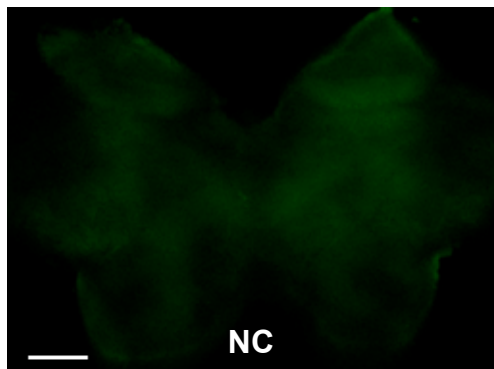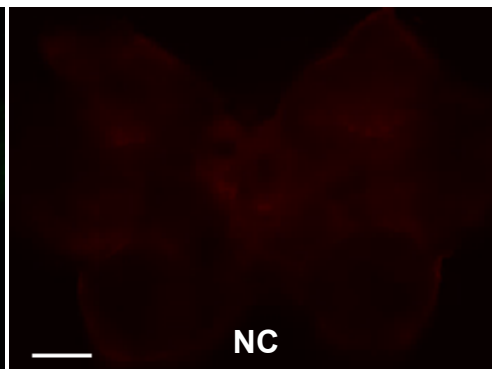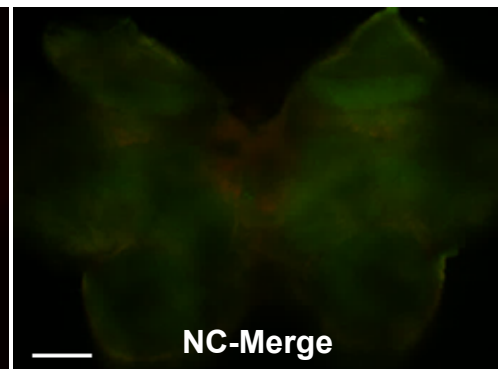

Supplement: supp [file elife-22526-supp-v1.zip]

**A**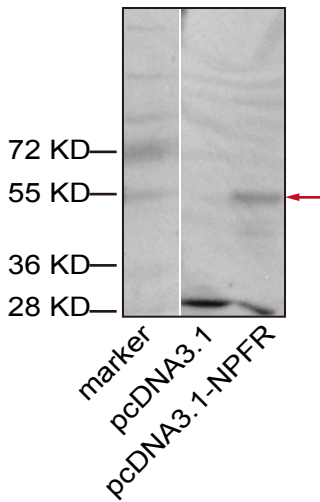**B**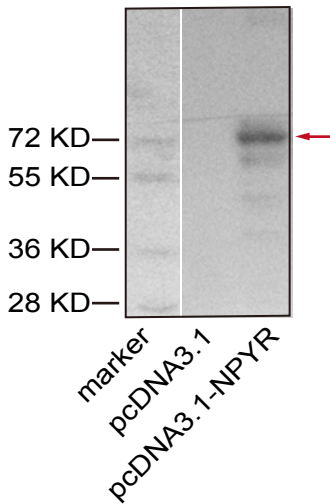

Supplement: supp [file elife-22526-supp-v1.zip]

**A**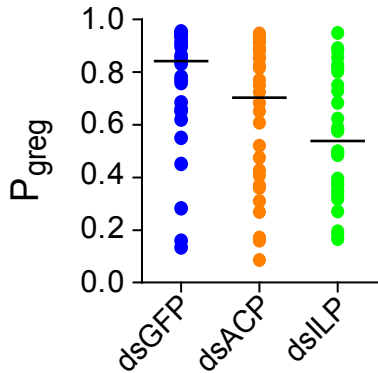**B**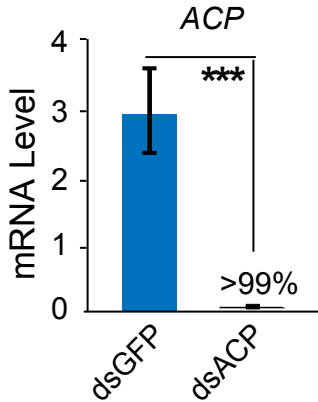**C**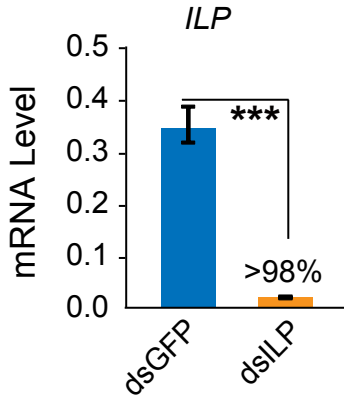

Supplement: supp [file elife-22526-supp-v1.zip]
